# Supplementary material for: Selective imaging of cathepsin L in breast cancer by fluorescent activity-based probes
Source: PubMed Central journal article supplement (PMC5896380; doi:10.1039/c7sc04303a), 2018-01-16
Supplement: SC-009-C7SC04303A-s001.pdf [file SC-009-C7SC04303A-s001.pdf]

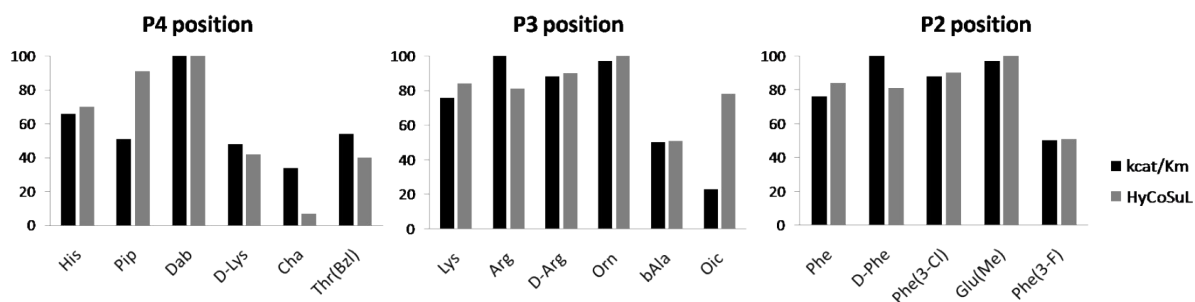

**Figure S1** The cathepsin L does not display the subsites cooperativity in S4-S2 pockets. The results from HyCoSuL profiling (substrate combinatorial libraries, grey bars) highly correlate with the results for individual fluorogenic substrates (black bars). The substrate sequences used in this assay were as follows: P4 position Ac-X-Lys-Phe-Arg-ACC, P3 position Ac-His-X-Phe-Arg-ACC, P2 position Ac-His-Lys-X-Arg-ACC. The y axis represents the relative rate of substrates hydrolysis (100% is the substrate with highest activity).

Ac-His-Arg-Phe-Arg-ACC

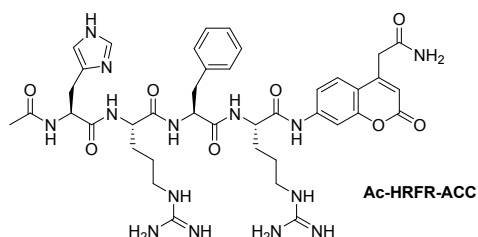

Ac-Dap-Orn-Phe(3-Cl)-Arg-ACC

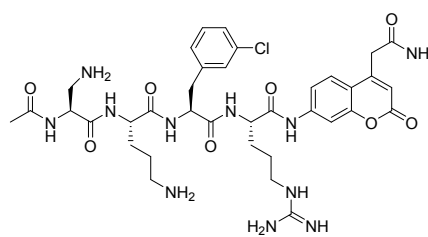

Ac-Dap-Arg-Phe(3-Cl)-Arg-ACC

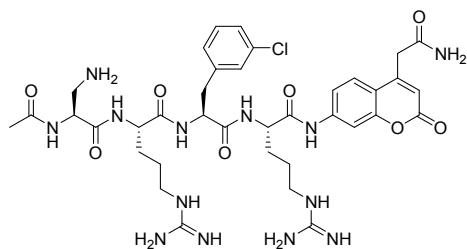

Ac-Dab-Orn-Phe(3-Cl)-Arg-ACC

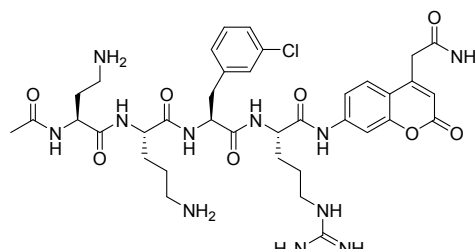

Ac-Dab-Arg-Phe(3-Cl)-Arg-ACC

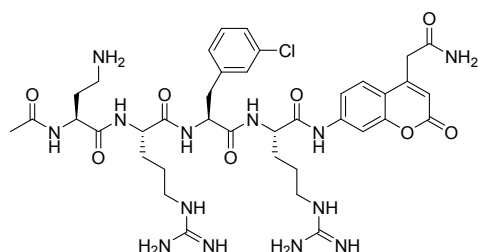

Ac-Dap-Orn-Phe(3-Cl)-Lys-ACC

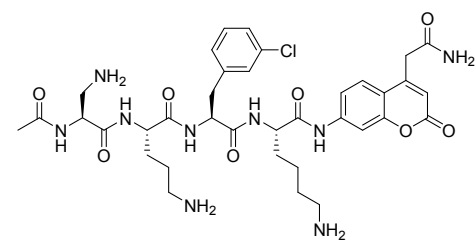

Ac-Dap-Orn-Phe(3-Cl)-hArg-ACC

Ac-Dap-Orn-Phe(3-Cl)-Leu-ACC

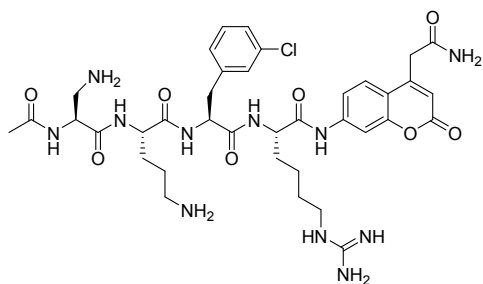

Ac-Dap-Orn-Phe(3-Cl)-Glu(Bzl)-ACC

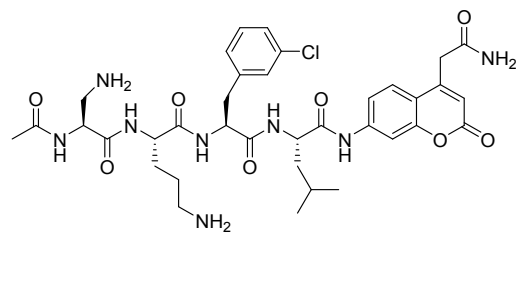

Ac-Dap-Orn-Phe(3-Cl)-Cys(Bzl)-ACC

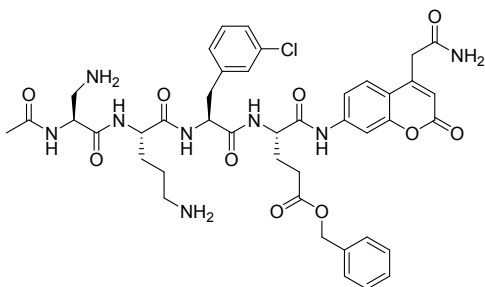

Ac-Dap-Orn-Phe(3-Cl)-Cys(MeBzl)-ACC

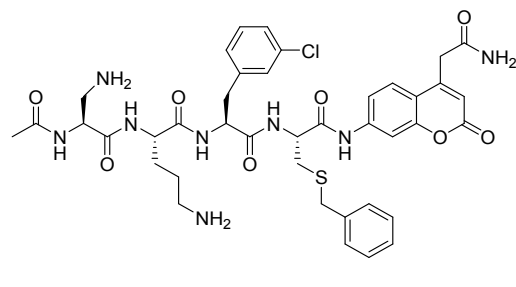

Ac-Dap-Orn-Phe(3-Cl)-Cys(MeOBzl)-ACC

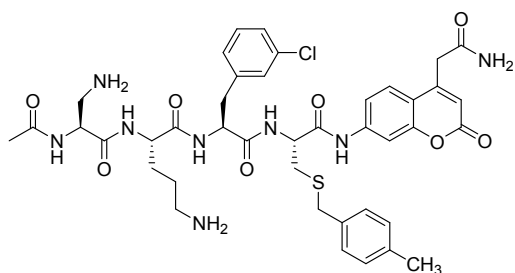

Ac-Dap-Orn-Phe(3-Cl)-Nle(OBzl)-ACC

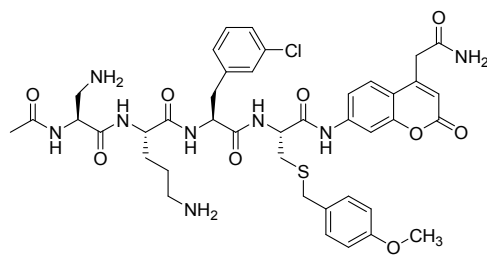

Ac-Dap-Orn-Phe(3-Cl)-Lys(2-Cl-Z)-ACC

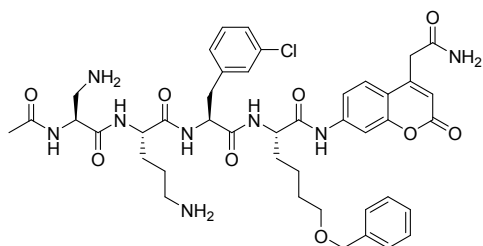

**Table S1** The structures of new, very active cathepsin L substrates containing unnatural amino acids. The Ac-His-Arg-Phe-Phe-ACC substrate was used as a reference one.

| ACC substrate                       | $K_M$ , $\mu\text{M}$ | $k_{\text{cat}}$ , $\text{s}^{-1}$ | $k_{\text{cat}}/K_M$ , $\text{M}^{-1}\text{s}^{-1}$ |
|-------------------------------------|-----------------------|------------------------------------|-----------------------------------------------------|
| Ac-Dap-Orn-Phe(3Cl)-Arg-ACC         | 5.38                  | 195                                | 36,310,000                                          |
| Ac-Dap-Orn-Phe(3Cl)-hArg-ACC        | 4.21                  | 123                                | 30,500,000                                          |
| Ac-Dap-Orn-Phe(3Cl)-Lys-ACC         | 7.11                  | 141                                | 19,810,000                                          |
| Ac-Dap-Orn-Phe(3Cl)-Leu-ACC         | 3.70                  | 41.8                               | 11,290,000                                          |
| Ac-Dap-Orn-Phe(3Cl)-Glu(Bzl)-ACC    | 5.67                  | 188                                | 34,270,000                                          |
| Ac-Dap-Orn-Phe(3Cl)-Cys(Bzl)-ACC    | 4.28                  | 191                                | 45,420,000                                          |
| Ac-Dap-Orn-Phe(3Cl)-Cys(MeBzl)-ACC  | 4.99                  | 207                                | 41,660,000                                          |
| Ac-Dap-Orn-Phe(3Cl)-Cys(MeOBzl)-ACC | 4.15                  | 193                                | 41,660,000                                          |
| Ac-Dap-Orn-Phe(3Cl)-Nle(O-Bzl)-ACC  | 2.63                  | 124                                | 47,400,000                                          |
| Ac-Dap-Orn-Phe(3Cl)-Lys(2-Cl-Z)-ACC | 2.98                  | 86.7                               | 29,280,000                                          |

**Table S2** Detailed kinetic parameters ( $K_M$ ,  $k_{\text{cat}}$ ,  $k_{\text{cat}}/K_M$ ) for the most active cathepsin L ACC-labeled tetrapeptide substrates. All parameters were calculated from four independent experiments, and S.D. for all values are below 15%.

Ac-Tic-Orn-Phe(4-F)-Leu-ACC

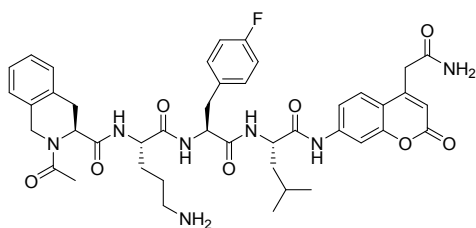

Ac-His-DArg-Phe(3,4-F<sub>2</sub>)-Leu-ACC

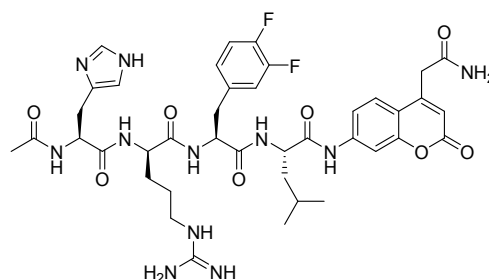

Ac-His-DLeu-Phe(F<sub>5</sub>)-Orn-ACC

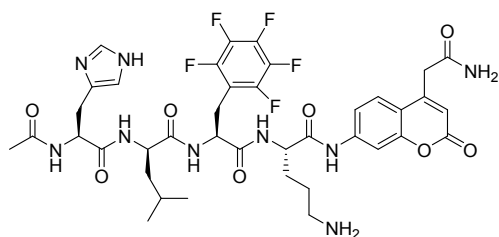

Ac-Tic-DOrn-Phe(2-Cl)-Lys-ACC

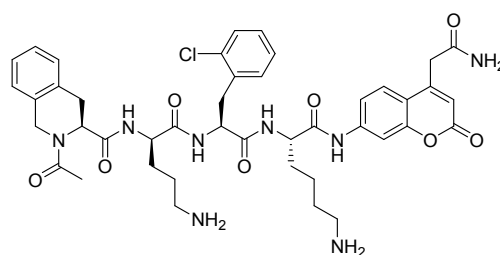

Ac-Met(O)-DArg-Phe(2-F)-Arg-ACC

Ac-Ala-DLys-Lys(Ac)-Arg-ACC

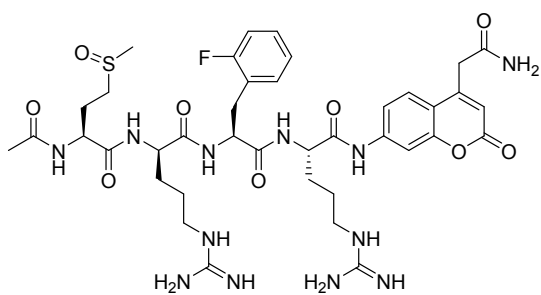

Ac-His-DVal-Phe(F5)-Arg-ACC

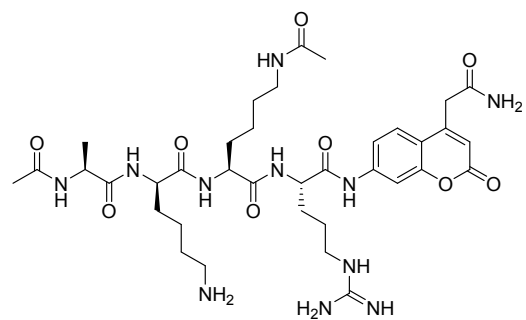

Ac-Tic-Dab-Phe(3,4-F<sub>2</sub>)-Arg-ACC

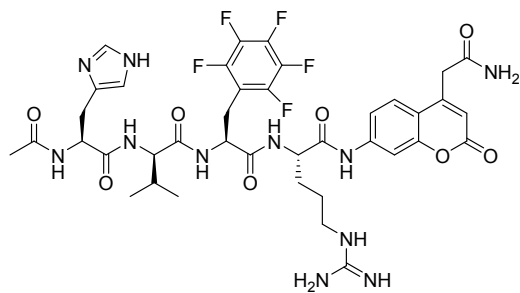

Ac-His-DLeu-Phe(3,4-Cl<sub>2</sub>)-Arg-ACC

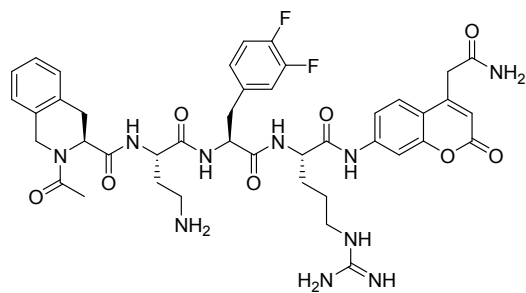

Ac-Ala-Orn-Phe(3,4-Cl<sub>2</sub>)-Arg-ACC

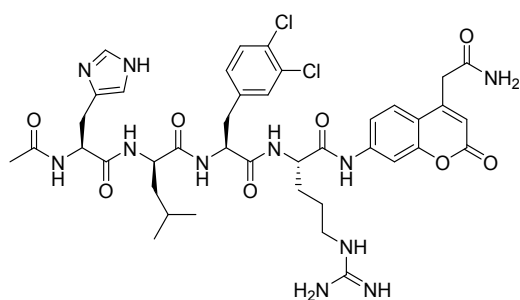

Ac-Pip-DLeu-Phe(3,4-F<sub>2</sub>)-Arg-ACC

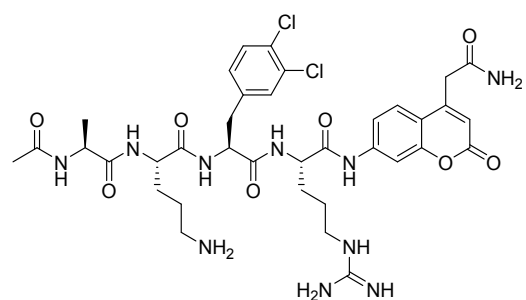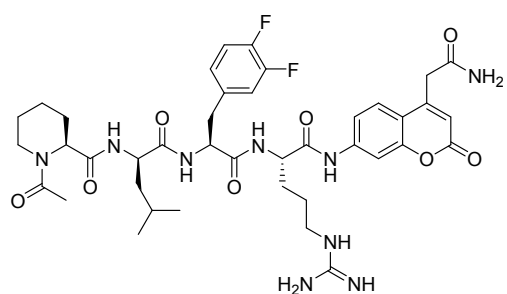

**Table S3** The structures of a first generation of cathepsin L selective substrates containing unnatural amino acids.

| Substrate<br>Ac-P4-P3-P2-P1-ACC        | Cathepsin  |             |            |             |            |
|----------------------------------------|------------|-------------|------------|-------------|------------|
|                                        | B          | K           | L          | S           | V          |
| Relative substrate activity RFU/s      |            |             |            |             |            |
| <b>His-Arg-Phe-Arg</b>                 | <b>272</b> | <b>24.5</b> | <b>875</b> | <b>40.3</b> | <b>224</b> |
| Tic-Orn-Phe(4-F)-Leu                   | 15.0       | 0.0         | 684        | 4.7         | 31.7       |
| His-DArg-Phe(3,4-F <sub>2</sub> )-Leu  | 22.3       | 0.0         | 474        | 12.7        | 30.5       |
| <b>His-DLeu-Phe(F<sub>5</sub>)-Orn</b> | <b>0.0</b> | <b>0.3</b>  | <b>153</b> | <b>0.0</b>  | <b>0.0</b> |
| Tic-DArg-Phe(2-Cl)-Lys                 | 3.1        | 0.0         | 134        | 10.3        | 36.1       |
| Met(O)-DArg-Phe(2-F)-Arg               | 76.2       | 0.2         | 658        | 21.1        | 129        |
| Ala-DLys-Lys(Ac)-Arg                   | 16.9       | 1.2         | 25.3       | 0.0         | 0.0        |
| <b>His-DVal-Phe(F<sub>5</sub>)-Arg</b> | <b>0.7</b> | <b>1.1</b>  | <b>706</b> | <b>0.0</b>  | <b>4.4</b> |
| Tic-Dab-Phe(3,4-F <sub>2</sub> )-Arg   | 41.2       | 0.2         | 825        | 2.8         | 28.4       |
| His-DLeu-Phe(3,4-Cl <sub>2</sub> )-Arg | 65.1       | 1.5         | 901        | 4.4         | 306        |
| Ala-Orn-Phe(3,4-Cl <sub>2</sub> )-Arg  | 189        | 4.6         | 844        | 3.4         | 346        |
| Pip-DLeu-Phe(3,4-F <sub>2</sub> )-Arg  | 9.4        | 1.2         | 699        | 7.8         | 103        |

**Table S4** The kinetic analysis of a first generation of cathepsin L selective substrate designed based on HyCoSuL profiling. Results in table present the rate of hydrolysis (RFU/s) of each substrate (100μM) by five cysteine cathepsins (B, K, L, S, and V; 5nM). The broad spectrum cathepsins Ac-HRFR-ACC substrate was used as a control. The most specific substrates (selected to construct the second generation library) are bold.

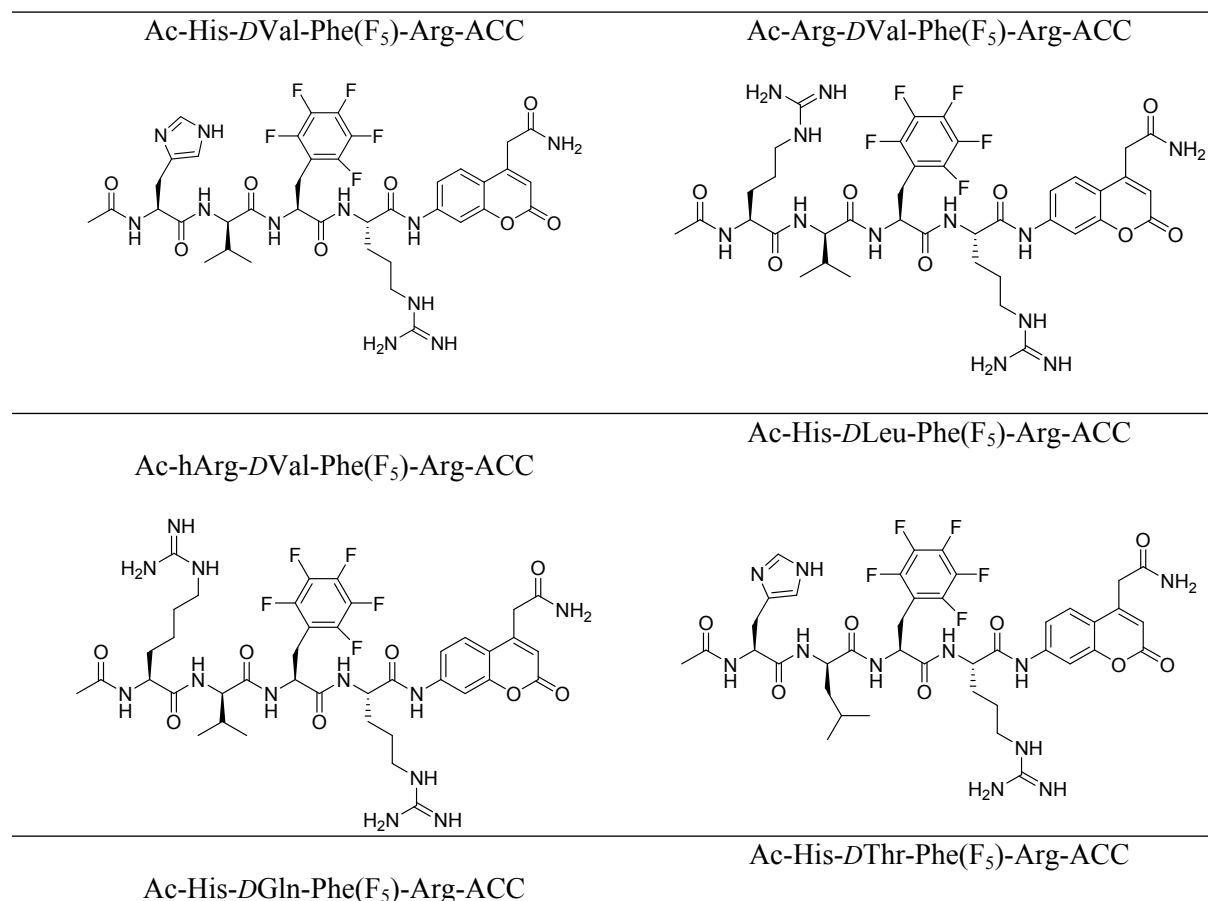

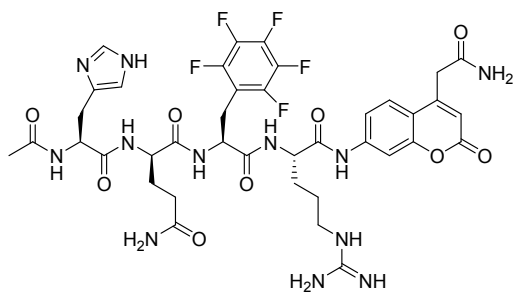

Ac-His-DLys-Phe(F<sub>5</sub>)-Arg-ACC

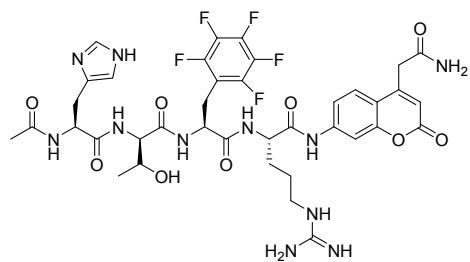

Ac-His-DVal-Phe(2-Cl)-Arg-ACC

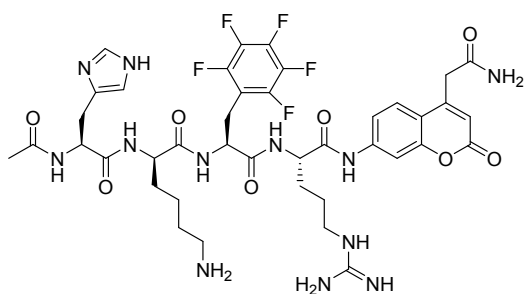

Ac-His-DVal-Phe(3,4-F<sub>2</sub>)-Arg-ACC

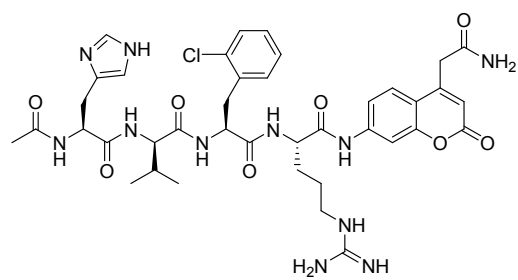

Ac-His-DVal-Phe(3-F)-Arg-ACC

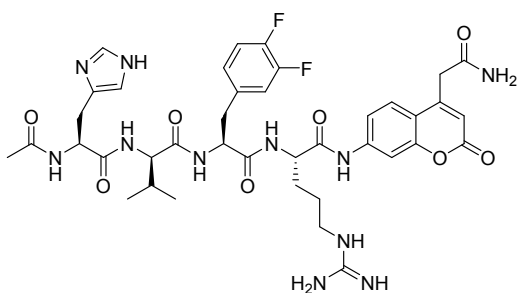

Ac-His-DVal-Thr(Bzl)-Arg-ACC

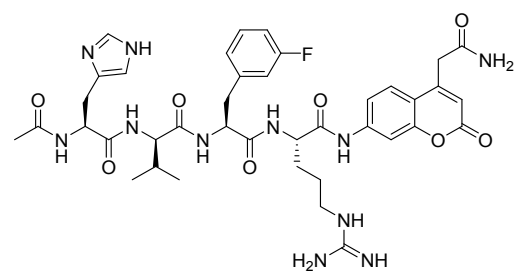

Ac-His-DVal-Phe(4-F)-Arg-ACC

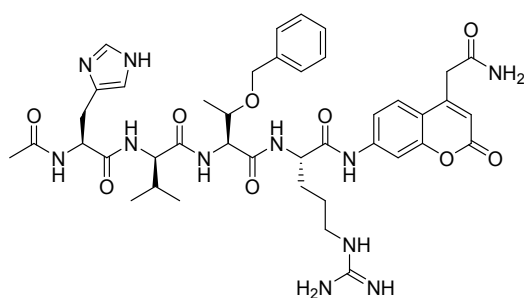

**Table S5** The structures of a second generation of cathepsin L specific substrates containing unnatural amino acids.

---

Ac-His-*D*Thr-Phe(F<sub>5</sub>)-Lys-ACC

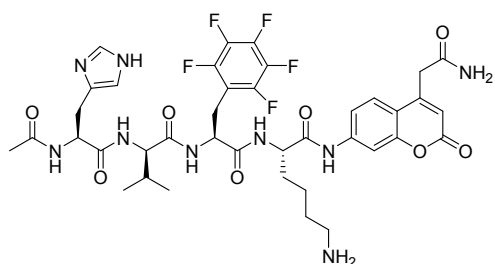

Ac-His-*D*Thr-Phe(F<sub>5</sub>)-Leu-ACC

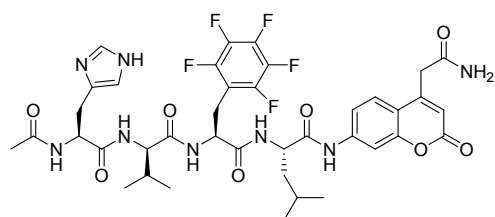

---

Ac-His-*D*Thr-Phe(F<sub>5</sub>)-hArg-ACC

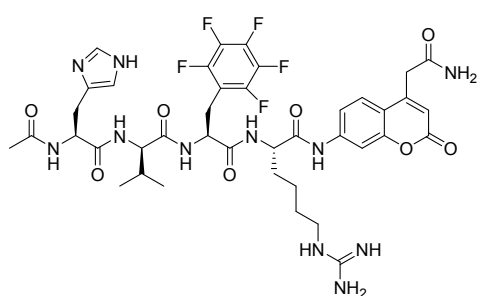

Ac-His-*D*Thr-Phe(F<sub>5</sub>)-Glu(Bzl)-ACC

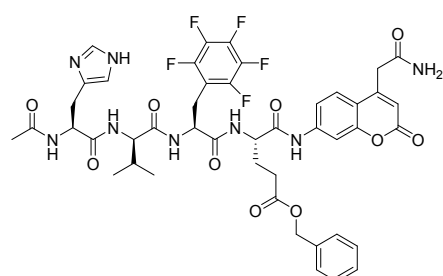

---

Ac-His-*D*Thr-Phe(F<sub>5</sub>)-Cys(Bzl)-ACC

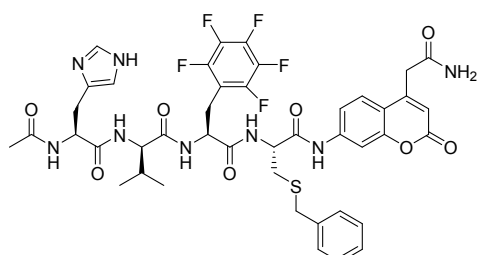

Ac-His-*D*Thr-Phe(F<sub>5</sub>)-Cye(MeBzl)-ACC

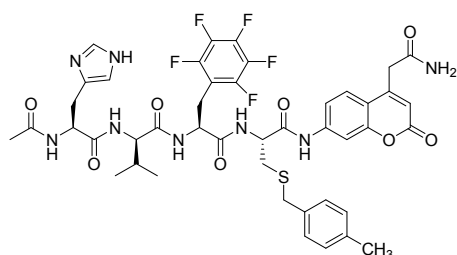

---

Ac-His-*D*Thr-Phe(F<sub>5</sub>)-Cys(MeOBzl)-ACC

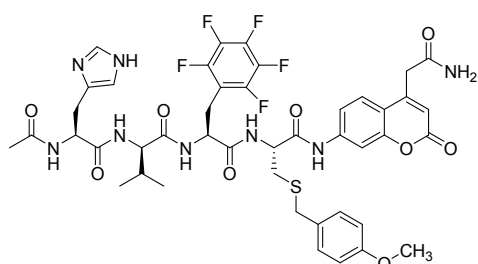

Ac-His-*D*Thr-Phe(F<sub>5</sub>)-Nle(OBzl)-ACC

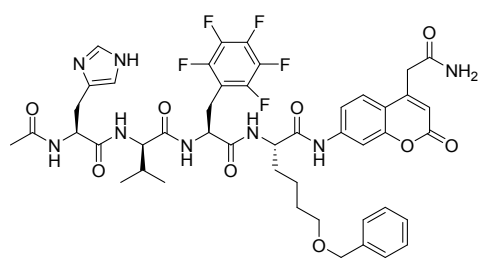

---

Ac-His-*D*Thr-Phe(F<sub>5</sub>)-Lys(2-Cl-Z)-ACC

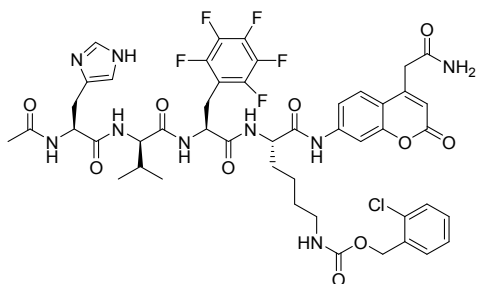

**Table S6** Structures of substrates with P4-P2 cathepsin L specific sequence (Ac-His-DThr-Phe(F<sub>5</sub>)-P1-ACC)

| enzyme                                                        | $k_{\text{cat}}/K_M, \text{M}^{-1}\text{s}^{-1}$ | $K_M, \mu\text{M}$ | $k_{\text{cat}}, \text{s}^{-1}$ |
|---------------------------------------------------------------|--------------------------------------------------|--------------------|---------------------------------|
| Substrate: <b>Ac-His-DThr-Phe(F<sub>5</sub>)-Arg-ACC</b>      |                                                  |                    |                                 |
| Cat L                                                         | 729,900                                          | 53.1               | 38.6                            |
| Cat V                                                         | 286                                              | 61.4               | 0.0178                          |
| Cat B                                                         | 94                                               | 71.5               | 0.00673                         |
| Cat K                                                         | < 10                                             | n.d.               | n.d.                            |
| Cat S                                                         | < 10                                             | n.d.               | n.d.                            |
| Substrate: <b>Ac-His-DVal-Phe(F<sub>5</sub>)-Cys(Bzl)-ACC</b> |                                                  |                    |                                 |
| Cat L                                                         | 732,900                                          | 5.67               | 4.21                            |
| Cat V                                                         | 1,250                                            | 7.76               | 0.00971                         |
| Cat B                                                         | 1,370                                            | 8.19               | 0.0115                          |
| Cat K                                                         | 190                                              | 11.5               | 0.00221                         |
| Cat S                                                         | < 10                                             | n.d.               | n.d.                            |

**Table S7** Detailed kinetic parameters of two cathepsin L selective ACC substrates. The data demonstrates that the selectivity is mainly driven by  $k_{\text{cat}}$  factor, whereas  $K_M$  parameter has almost no impact on the selectivity. All parameters were calculated from four independent experiments, and S.D. for all values are below 15%. n.d. – not determined.



Cathepsin L selective probes

Pan-specific cathepsin probes

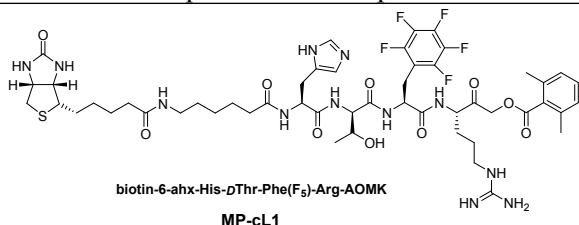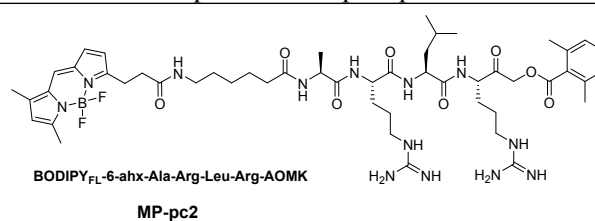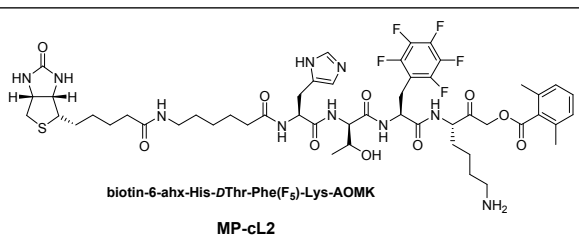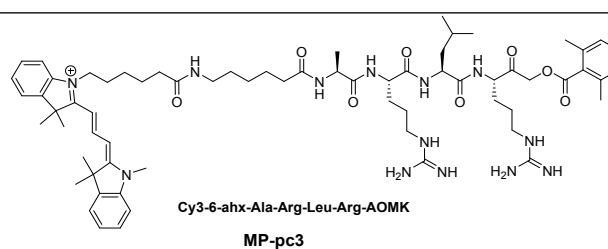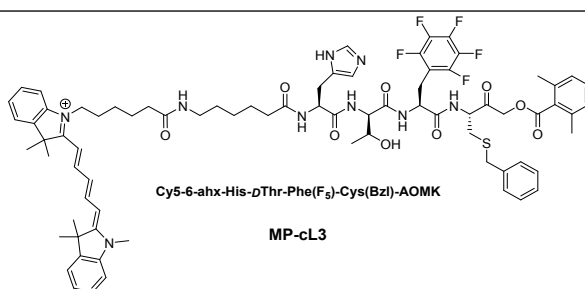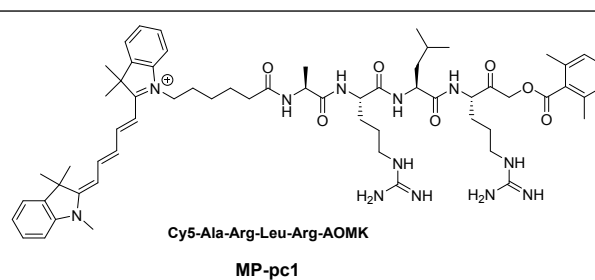

**Table S8** Structures of broad spectrum and selective cathepsin activity based probes labeled with various tags.

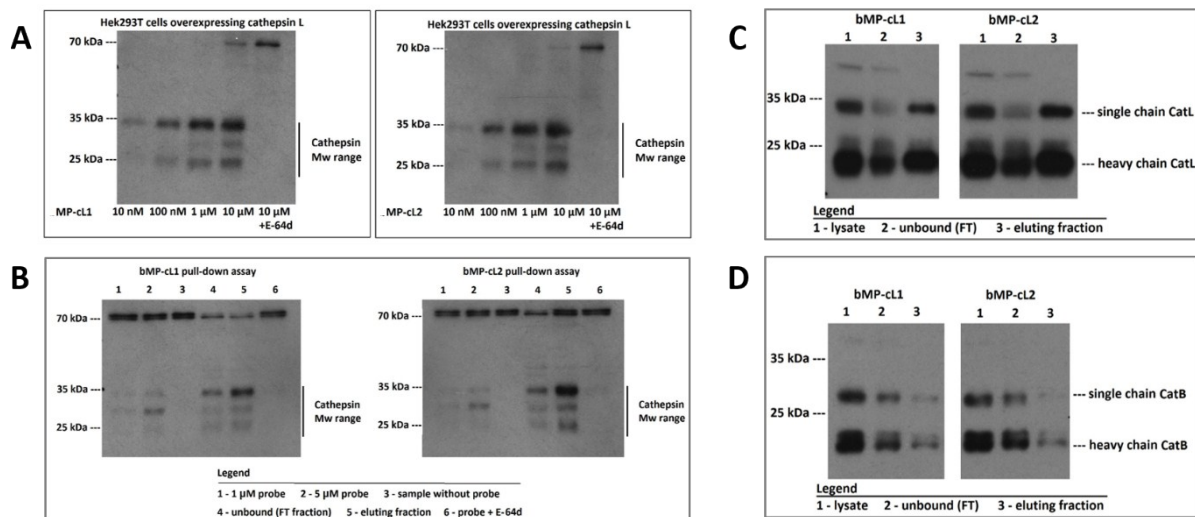

**Figure S2** Cathepsin L detection and pull-down experiments in cathepsin L-overexpressing HEK293T cells. **Panel A.** To assess probe uptake, HEK293T cells overexpressing cathepsin L were incubated with various concentrations of ABPs (10 nM - 10 μM). Analysis shows that probes can enter cells and label cathepsin L efficiently at concentrations as low as 100 nM. **Panel B.** To test probe applicability, we incubated HEK293T cells overexpressing cathepsin L with probes and assessed affinity enrichment of biotinylated proteins. While MP-cL1 and MP-cL2 probes showed significant enrichment (compare labeled lysate with the eluting fraction after pulldown), E-64d treatment blocked the signal in the cathepsin MW range. **Panel C and D.** To validate cathepsin L/B selectivity we performed immunologic detection of cathepsin L and B after a pulldown assay in HEK293T cells overexpressing cathepsin L. Strong signals for cathepsin L single and heavy chain (Panel C) and B single and heavy chain (panel D) were detected in lysates. In the unbound fraction, strong signals in the eluting fraction were observed only for cathepsin L.

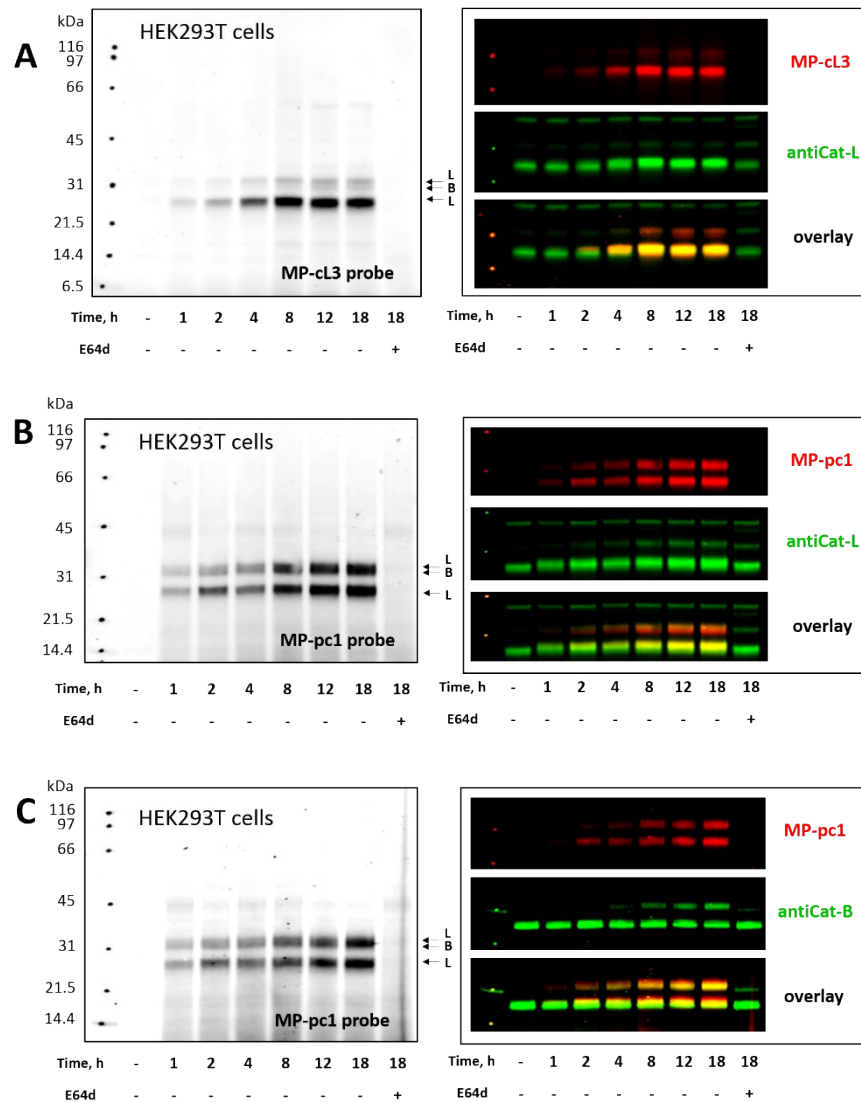

**Figure S3** Cathepsins labeling by two Cy5-tagged probes in HEK293T cells. **Panel A.** Cells (100,000/well/mL) were incubated with MP-cL3 (1 $\mu$ M) probe for 0-18 hours. Next, cells were harvested and subjected for Western blotting. MP-cL3 probe is very selective toward cathepsin L even after 18 hours of incubation (only residual cathepsin B activity is detected). However, these cells demonstrate the different cathepsin L processing than MDA-MB-231, thus mostly heavy chain of cathepsin L is labeled. **Panel B and Panel C.** Cells (100,000/well/mL) were incubated with pan-specific MP-pc1 (1 $\mu$ M) probe for 0-18 hours. Next, cells were harvested and subjected for Western blotting. The probe-antibody overlay indicates that MP-pc1 probe binds to cathepsin L (**Panel B**) and cathepsin B (**Panel C**).

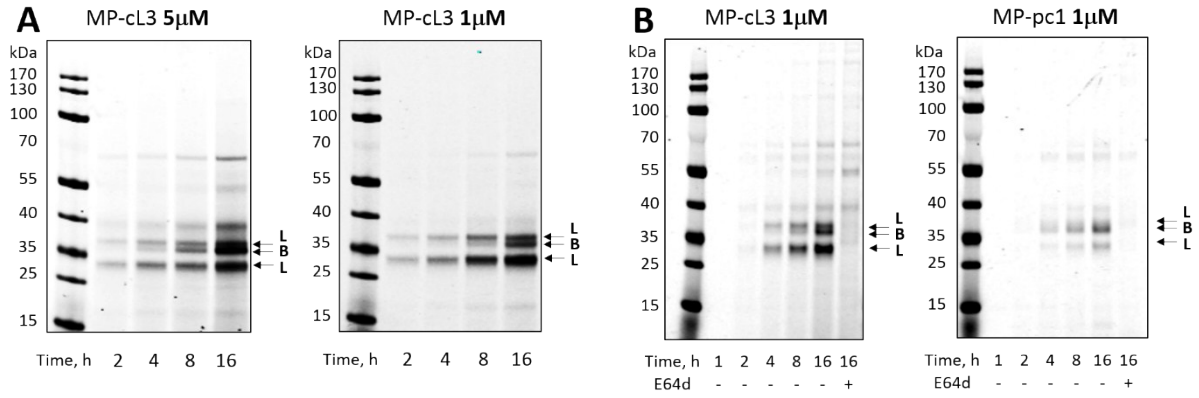

**Figure S4** Labeling of cathepsin L and B in living MDA-MB-231 cells using Cy5-labeled activity based probes. **Panel A.** Cells were incubated with cathepsin L selective probe (1µM and 5µM) for 2-16 hours. 5µM of MP-cL3 probe specifically labels cathepsin L only up to two hours, between 4 and 8 hours probe labels also cathepsin B, and after 16 hours this probe labels mostly cathepsin B. However, at the 1µM this probe is much more selective and labels exclusively cathepsin L up to 8 hours. After 16 hours probe labels also cathepsin B. **Panel B.** MP-cL3 probe labels only cathepsin L (up to 8 hours), while MP-pc1 probe labels mostly cathepsin B (between 4-16 hours). Cells preincubated with E64d (25µM, 2 hours) show no cathepsins activity.

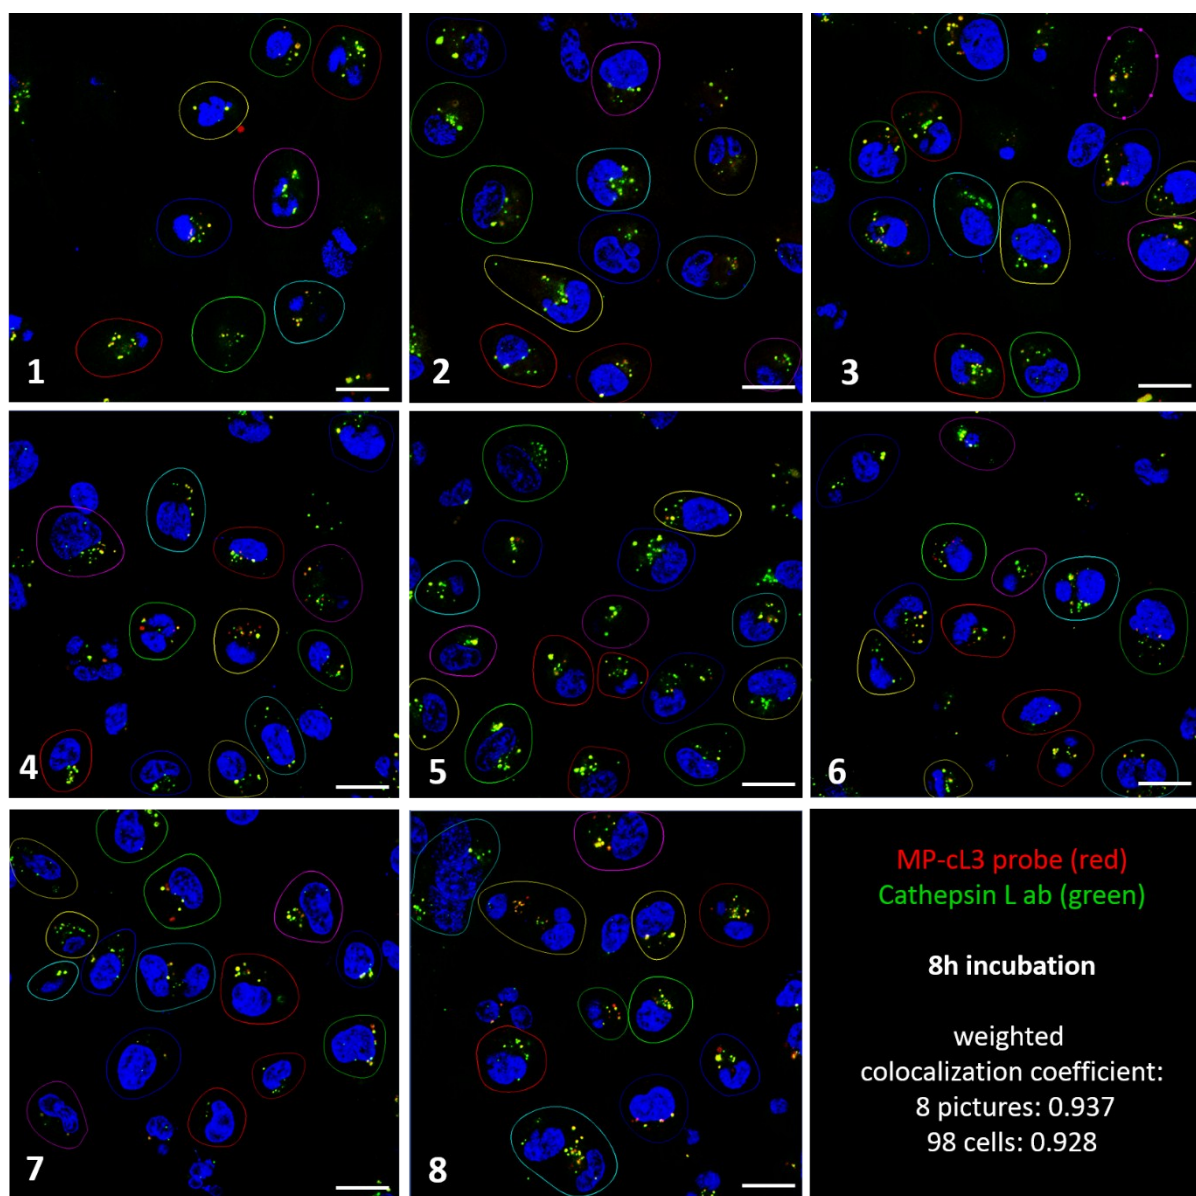

**Figure S5** Cathepsin L labeling by MP-cL3 probe in MDA-MB-231 cells. The figure represents eight slides from two independent experiments. MDA-MB-231 cells were incubated with MP-cL3 (red) probe (1 $\mu$ M) for 8 hours, and then were fixed with methanol, stained with cathepsin L antibody (green) and subjected for confocal fluorescence microscopy. Results demonstrate that MP-cL3 can selectively label active cathepsin L when incubated with cells up to 8 hours. The aggregated weighted colocalization coefficient from eight slides was calculated. Circles around cells demonstrate the area taken to calculate weighted colocalization coefficient within single cells. Scale bar 20  $\mu$ m.

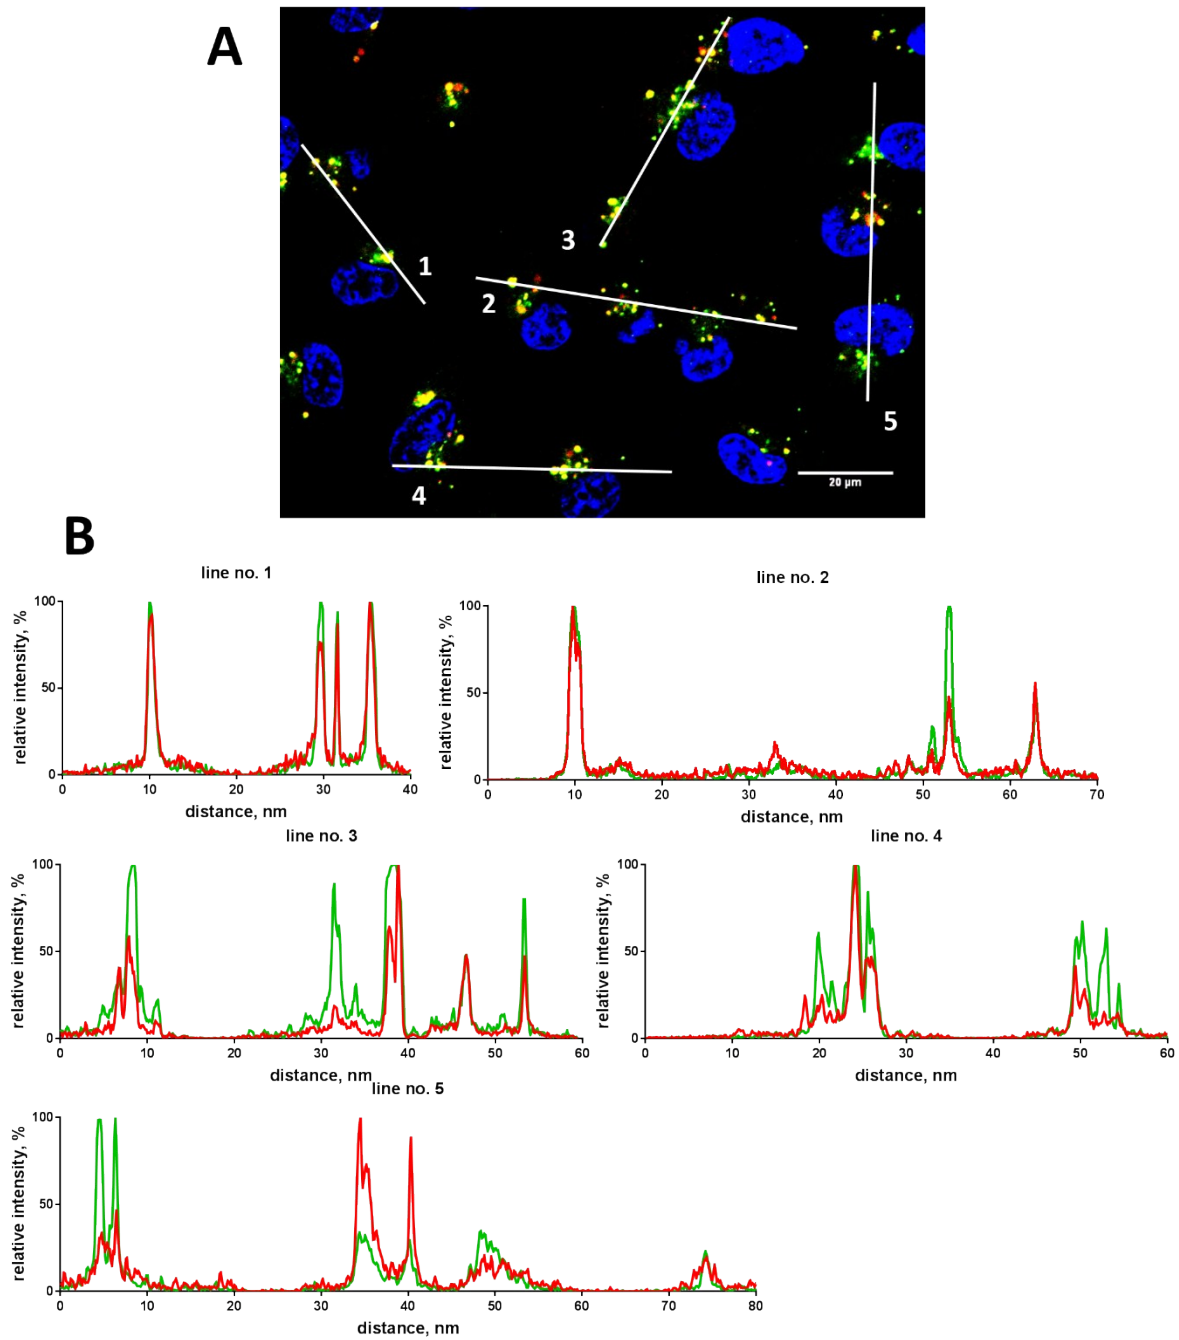

**Figure S6** Colocalization between cathepsin L ABP and cathepsin L antibody. **Panel A** MDA-MB-231 cells were incubated with MP-cL3 (red) probe (1  $\mu$ M) for 8 hours, and then were fixed with methanol, stained with cathepsin L antibody (green) and subjected for confocal fluorescence microscopy (DAPI is colored blue). **Panel B** Graphs present pixel intensity from the five lines drawn on the image. The intensity in both channels (red for ABP, and green for cathepsin antibody) was adjusted to 100% (y axis). On the x axis the length of line (in nanometers) is presented. The high weighted colocalization between red and green channels is indicated by overlapping traces (high intensity red signals correlate with high intensity green signals, and the same is true for low intensity signals).

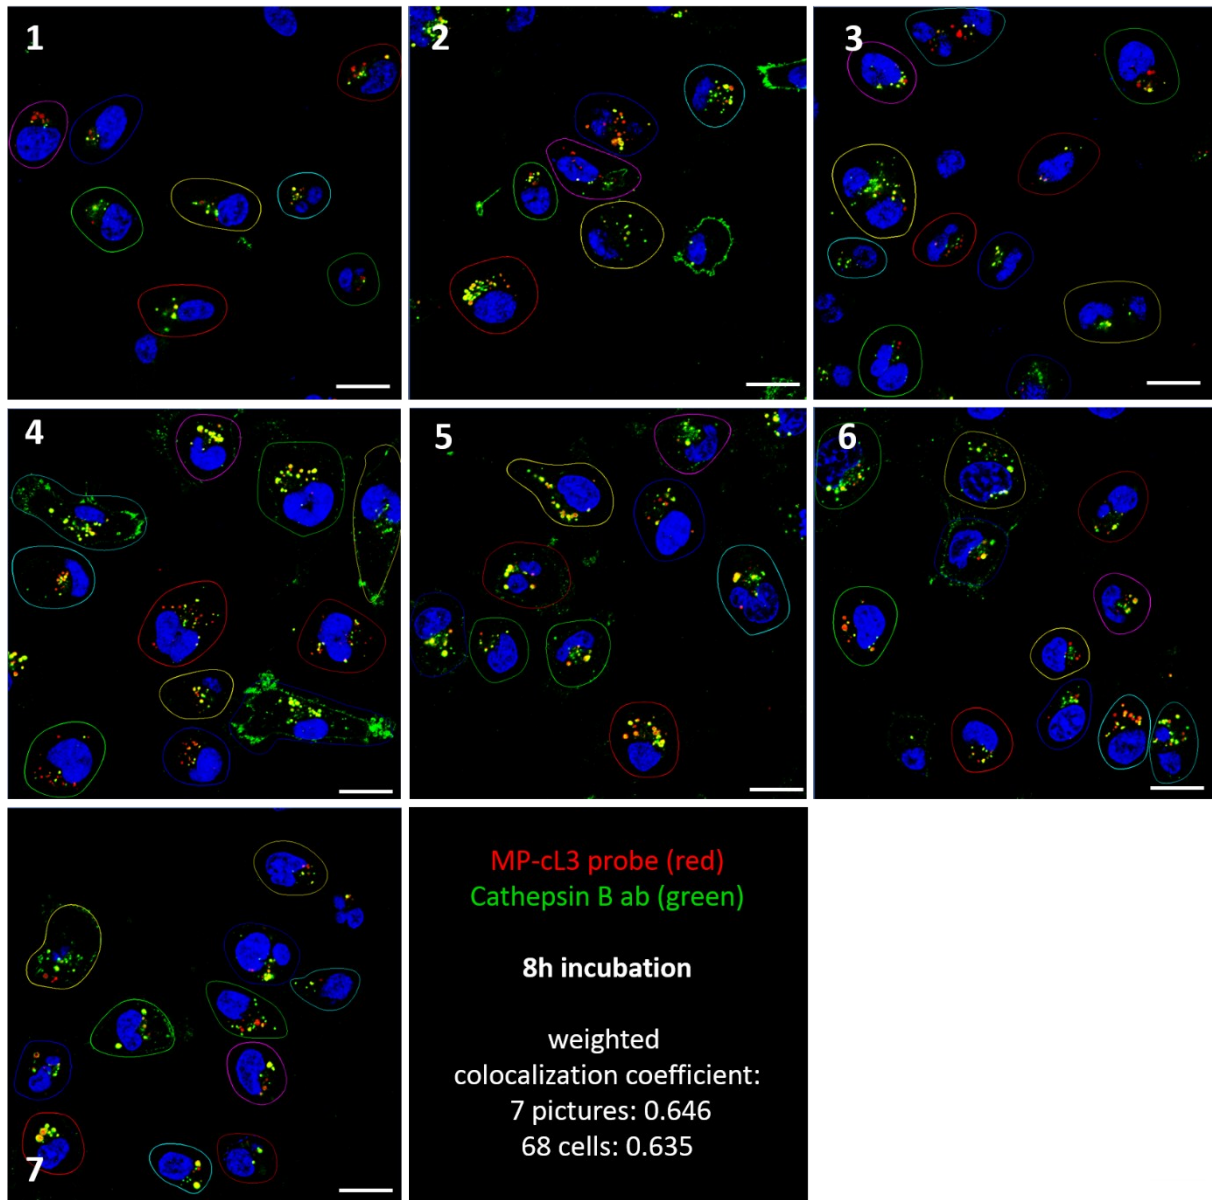

**Figure S7** Cathepsin L labeling by MP-cL3 probe in MDA-MB-231 cells. The figure represents seven slides from two independent experiments. To ensure cathepsin L specific labeling, cells were incubated with MP-cL3 (red) probe (1  $\mu$ M) for 8 hours, and then were fixed with methanol, stained with cathepsin B antibody (green) and subjected for confocal fluorescence microscopy. Results demonstrate that the red spots (active cathepsin L) partially overlays with cathepsin B, indicating that these two enzymes are located in the same lysosomes. However, there are also some vesicles where only cathepsin B is present. The aggregated weighted colocalization coefficient from eight slides was calculated. Circles around cells represent the area taken to calculate weighted colocalization coefficient within single cells. Scale bar 20  $\mu$ m.

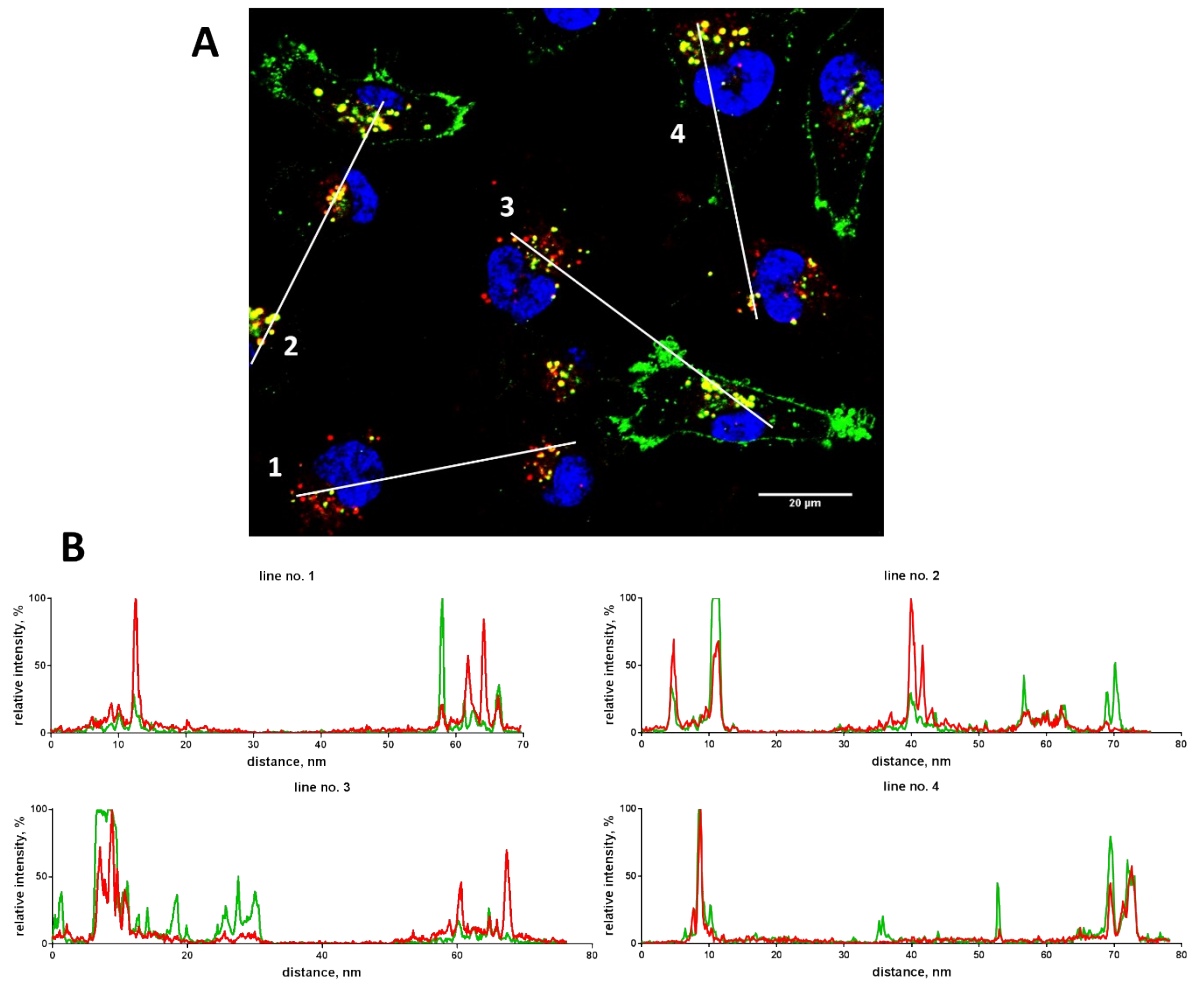

**Figure S8** Colocalization between cathepsin L ABP and cathepsin B antibody. **Panel A** MDA-MB-231 cells were incubated with MP-cL3 (red) probe ( $1\mu\text{M}$ ) for 8 hours, and then were fixed with methanol, stained with cathepsin B antibody (green) and subjected for confocal fluorescence microscopy (DAPI is colored blue). **Panel B** Graphs present pixel intensity from the five lines drawn on the image. The intensity in both channels (red for ABP, and green for cathepsin antibody) was adjusted to 100% (y axis). On the x axis the length of line (in nanometers) is presented. The poor weighted colocalization between red and green channels is indicated by nonoverlapping traces (high intensity red signals do not correlate with high intensity green signals, and the same is true for low intensity signals).



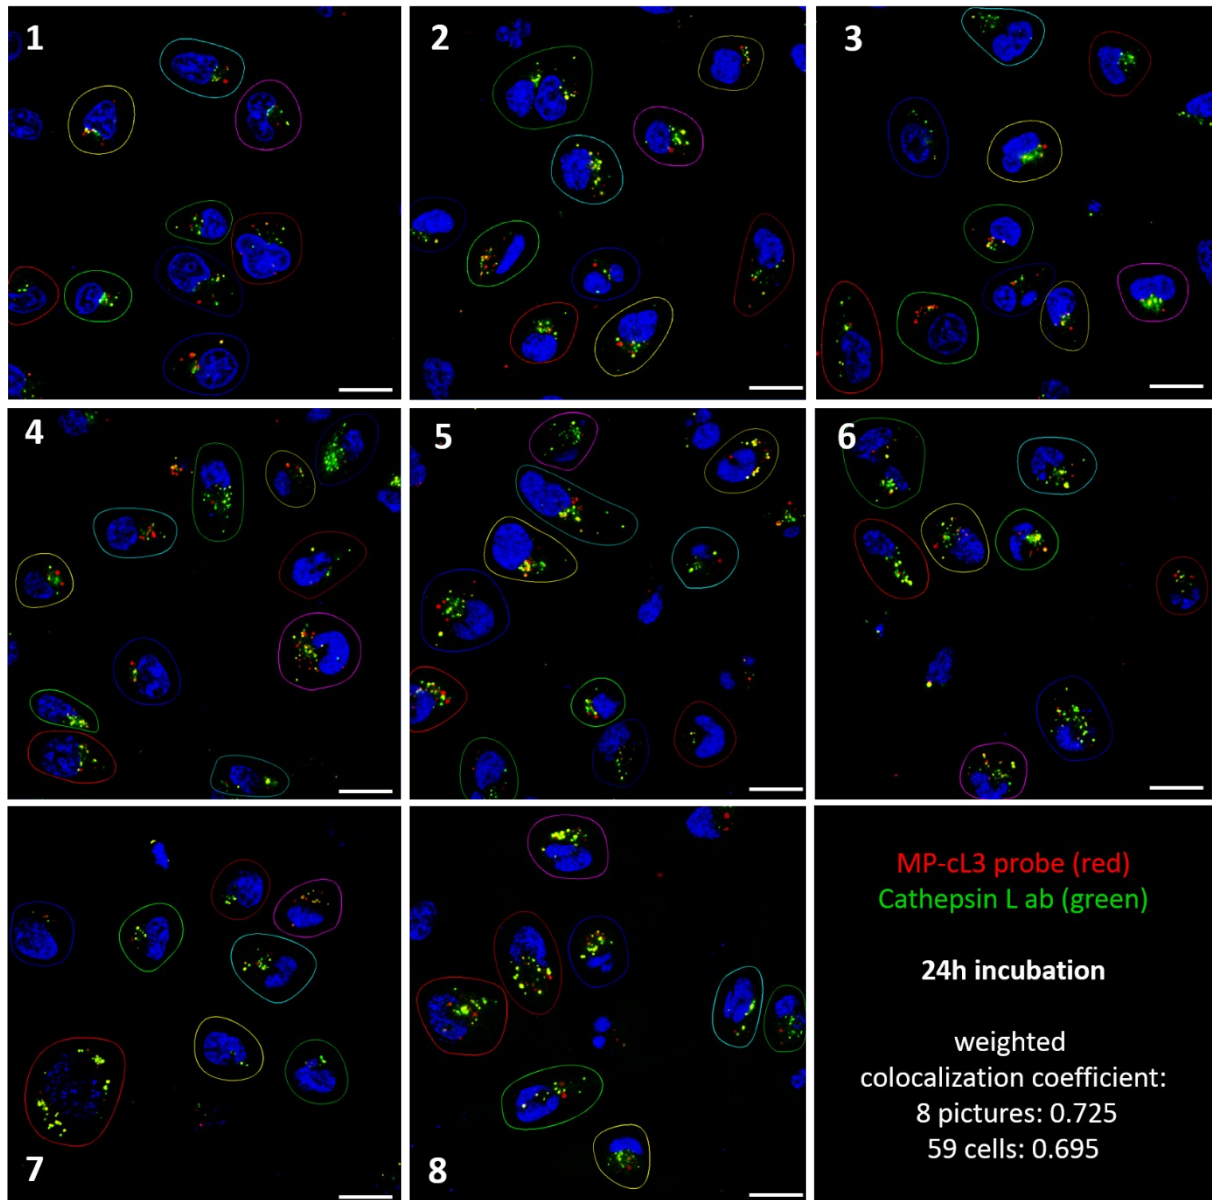

**Figure S9** Cathepsin L labeling by MP-cL3 probe in MDA-MB-231 cells. The figure represents eight slides from two independent experiments. Cells were incubated with MP-cL3 (red) probe (1  $\mu$ M) for 24 hours, and then were fixed with methanol, stained with cathepsin L antibody (green) and subjected for confocal fluorescence microscopy. Results demonstrate that after prolonged incubation MP-cL3 probes loses the selectivity and labels also cathepsin B (as indicated by immunoblotting). The aggregated weighted colocalization coefficient from eight slides was calculated. Circles around cells demonstrate the area taken to calculate weighted colocalization coefficient within single cells. Scale bar 20  $\mu$ m.

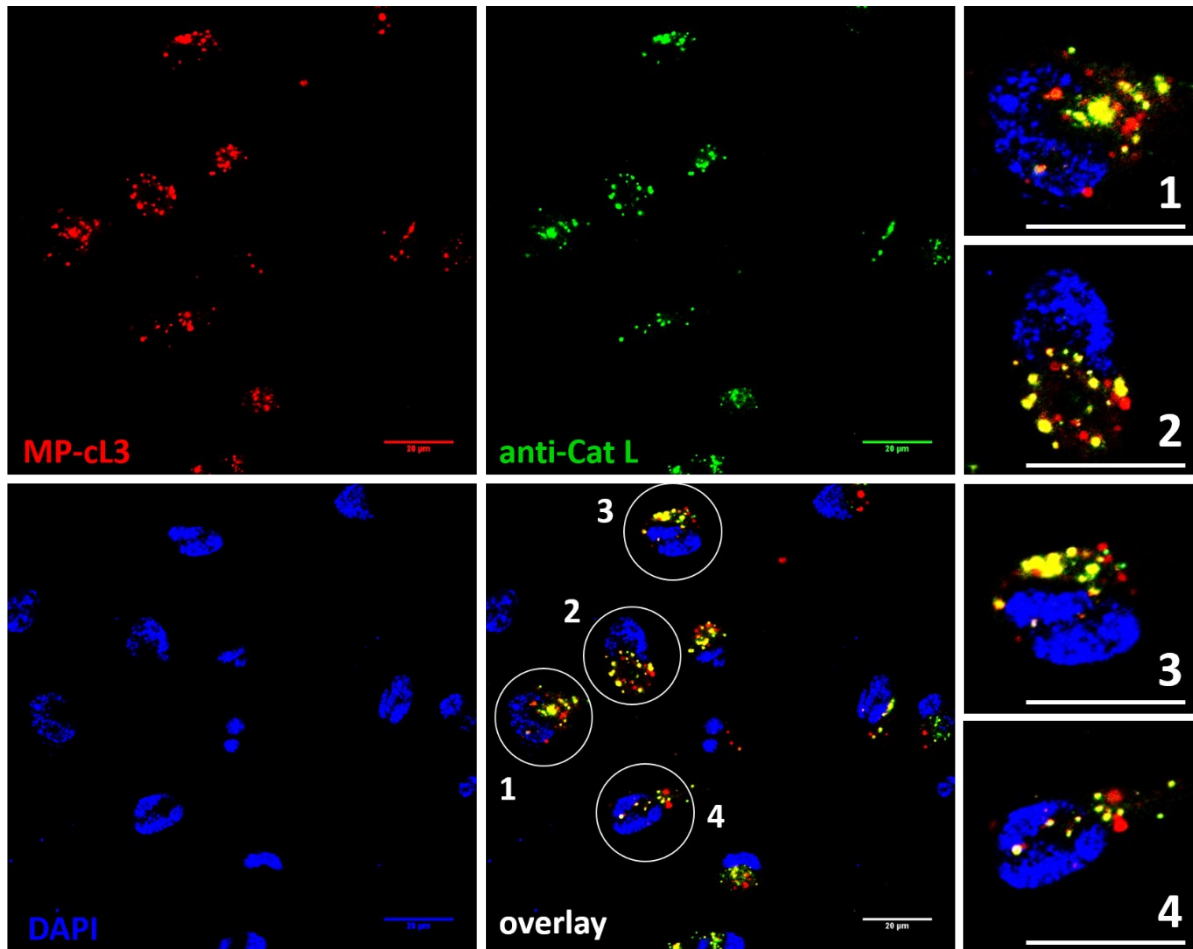

**Figure S10** Cathepsin L labeling by MP-cL3 probe in MDA-MB-231 cells. In the experiment, cells were incubated with MP-cL3 (red) probe (1  $\mu$ M) for 24 hours, and then were fixed with methanol, stained with cathepsin L antibody (green) and subjected for confocal fluorescence microscopy. Results demonstrate that after prolonged incubation MP-cL3 probes loses the selectivity and labels also cathepsin B (as indicated by immunoblotting). Scale bar 20  $\mu$ m.

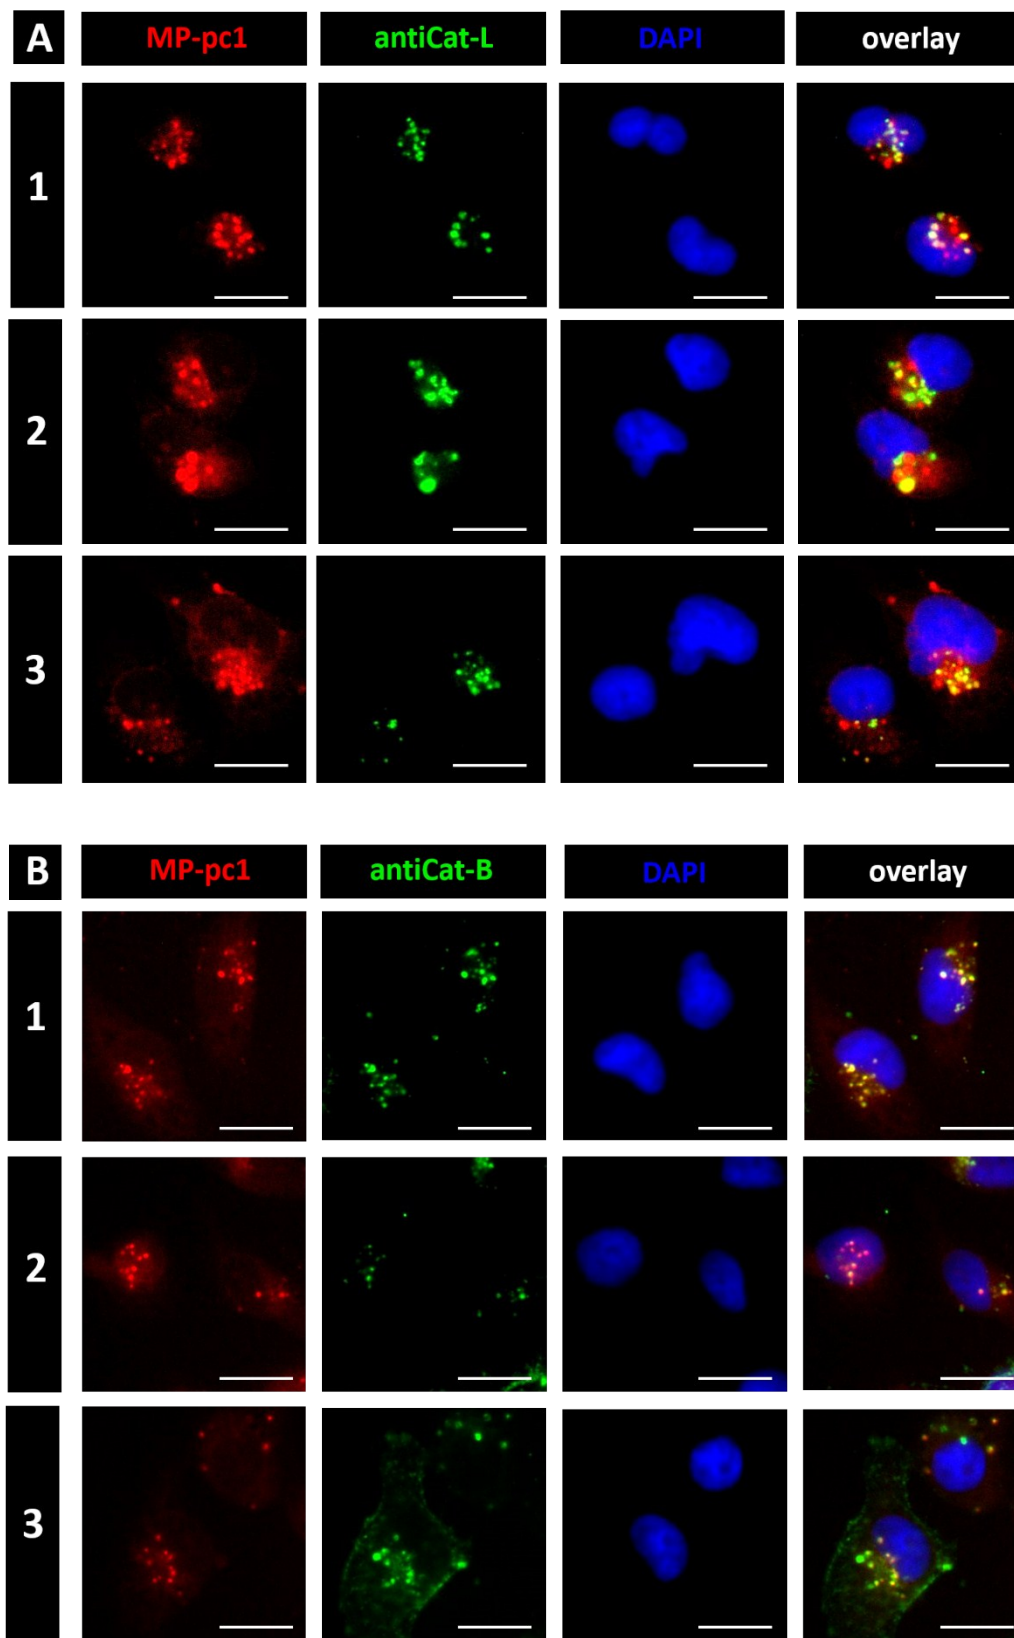

**Figure S11** Cathepsins labeling by MP-pc1 probe in MDA-MB-231 cells. General cathepsins probe, MP-pc1 (1  $\mu$ M) was incubated with cells for 8 hours. Then cells were fixed with methanol and incubated with cathepsin L either cathepsin B antibodies. The fluorescence microscopy analysis reveals that this probe labels both enzymes, however, cathepsin B shows better co-localization with the probe. Scale bar 15  $\mu$ m.

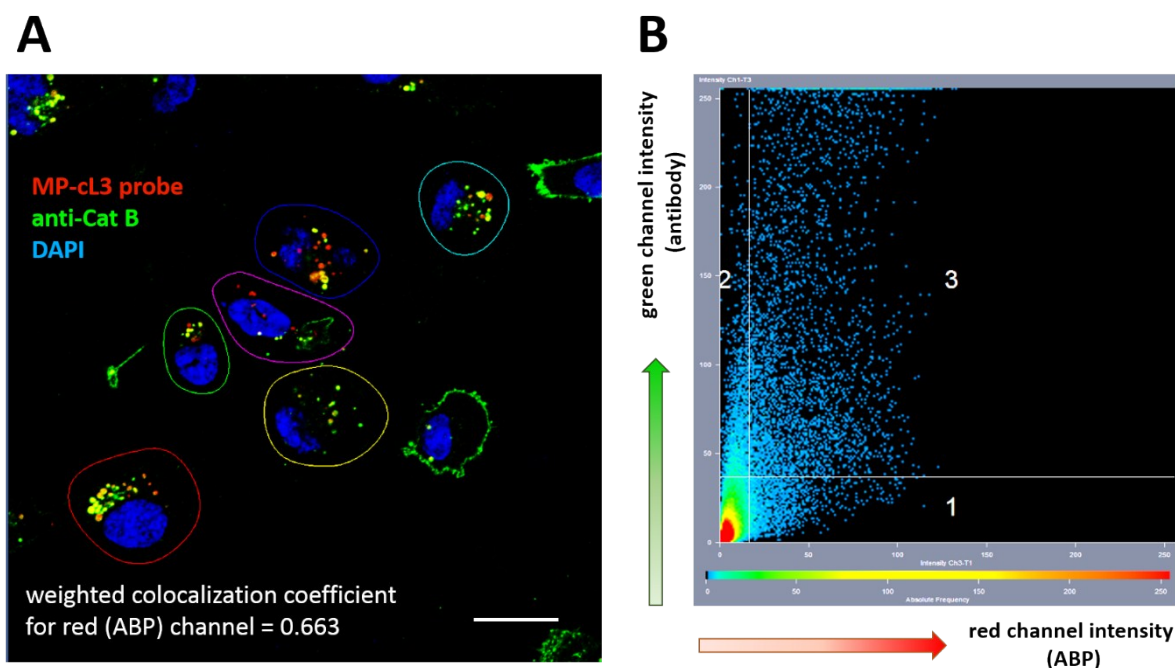

**Figure S12** Calculation of weighted colocalization coefficient between cathepsin L probe and cathepsin B antibody. **Panel A** Fluorescence microscopy image of MDA-MB-231 cells labeled with MP-cL3 probe and cathepsin B antibody. **Panel B** All the pixels from the picture were used to calculate weighted colocalization coefficient between red and green channels. These calculations were performed by summing the pixels in the colocalized regions (red and green; Quadrant 3) and dividing by the sum of pixels in red channel (ABP; Quadrant 1 + Quadrant 3). The value of each pixel was equal to its intensity value (from 0 to 1). To eliminate the red and green channels staining background, we set crosshairs according to single label controls.

| No.                   | Structure                                    | [M+H] <sup>+</sup><br>calculated | [M+H] <sup>+</sup><br>measured |
|-----------------------|----------------------------------------------|----------------------------------|--------------------------------|
| <b>ACC SUBSTRATES</b> |                                              |                                  |                                |
| 1                     | Ac-His-Arg-Phe-Arg-ACC                       | 857.4171                         | 857.4255                       |
| 2                     | Ac-Dap-Orn-Phe(3-Cl)-Arg-ACC                 | 798.3454                         | 798.3456                       |
| 3                     | Ac-Dap-Arg-Phe(3-Cl)-Arg-ACC                 | 840.3672                         | 840.3655                       |
| 4                     | Ac-Dab-Orn-Phe(3-Cl)-Arg-ACC                 | 812.3611                         | 812.3622                       |
| 5                     | Ac-Dab-Arg-Phe(3-Cl)-Arg-ACC                 | 854.3829                         | 854.3955                       |
| 6                     | Ac-Dap-Orn-Phe(3-Cl)-Lys-ACC                 | 770.3393                         | 770.3366                       |
| 7                     | Ac-Dap-Orn-Phe(3-Cl)-hArg-ACC                | 812.3611                         | 812.3612                       |
| 8                     | Ac-Dap-Orn-Phe(3-Cl)-Leu-ACC                 | 755.3284                         | 755.3258                       |
| 9                     | Ac-Dap-Orn-Phe(3-Cl)-Glu(Bzl)-ACC            | 861.3338                         | 861.3545                       |
| 10                    | Ac-Dap-Orn-Phe(3-Cl)-Cys(Bzl)-ACC            | 835.3004                         | 835.3055                       |
| 11                    | Ac-Dap-Orn-Phe(3-Cl)-Cys(MeBzl)-ACC          | 849.3161                         | 849.3126                       |
| 12                    | Ac-Dap-Orn-Phe(3-Cl)-Cys(MeOBzl)-ACC         | 865.3110                         | 865.3122                       |
| 13                    | Ac-Dap-Orn-Phe(3-Cl)-Nle(OBzl)-ACC           | 861.3702                         | 861.3750                       |
| 14                    | Ac-Dap-Orn-Phe(3-Cl)-Lys(2-Cl-Z)-ACC         | 938.3371                         | 938.3355                       |
| 15                    | Ac-Tic-Orn-Phe(4-F)-Leu-ACC                  | 812.3783                         | 812.3788                       |
| 16                    | Ac-His-DArg-Phe(3,4-F <sub>2</sub> )-Leu-ACC | 850.3812                         | 850.3814                       |
| 17                    | Ac-His-DLeu-Phe(F <sub>3</sub> )-Orn-ACC     | 862.3311                         | 862.3254                       |

|                              |                                                                          |                                  |                                |
|------------------------------|--------------------------------------------------------------------------|----------------------------------|--------------------------------|
| 18                           | Ac-Tic-DOrn-Phe(2-Cl)-Lys-ACC                                            | 843.3597                         | 843.3655                       |
| 19                           | Ac-Met(O)-DArg-Phe(2-F)-Arg-ACC                                          | 885.3841                         | 885.3789                       |
| 20                           | Ac-Ala-DLys-Lys(Ac)-Arg-ACC                                              | 786.4262                         | 786.4356                       |
| 21                           | Ac-His-DVal-Phe(F <sub>5</sub> )-Arg-ACC                                 | 890.3373                         | 890.3389                       |
| 22                           | Ac-Tic-Dab-Phe(3,4-F <sub>2</sub> )-Arg-ACC                              | 859.3703                         | 589.3709                       |
| 23                           | Ac-His-DLeu-Phe(3,4-Cl <sub>2</sub> )-Arg-ACC                            | 882.3221                         | 882.3199                       |
| 24                           | Ac-Ala-Orn-Phe(3,4-Cl <sub>2</sub> )-Arg-ACC                             | 817.2955                         | 817.2912                       |
| 25                           | Ac-Pip-DLeu-Phe(3,4-F <sub>2</sub> )-Arg-ACC                             | 824.3907                         | 824.3998                       |
| 26                           | Ac-His-DVal-Phe(F <sub>5</sub> )-Arg-ACC                                 | 890.3373                         | 890.3401                       |
| 27                           | Ac-Arg-DVal-Phe(F <sub>5</sub> )-Arg-ACC                                 | 909.3795                         | 909.3806                       |
| 28                           | Ac-hArg-DVal-Phe(F <sub>5</sub> )-Arg-ACC                                | 923.3951                         | 923.3952                       |
| 29                           | Ac-His-DLeu-Phe(F <sub>5</sub> )-Arg-ACC                                 | 904.3529                         | 904.3498                       |
| 30                           | Ac-His-DGln-Phe(F <sub>5</sub> )-Arg-ACC                                 | 919.3274                         | 919.3244                       |
| 31                           | Ac-His-DThr-Phe(F <sub>5</sub> )-Arg-ACC                                 | 892.3165                         | 892.3199                       |
| 32                           | Ac-His-DLys-Phe(F <sub>5</sub> )-Arg-ACC                                 | 919.3638                         | 919.3654                       |
| 33                           | Ac-His-DVal-Phe(2-Cl)-Arg-ACC                                            | 834.3454                         | 934.3507                       |
| 34                           | Ac-His-DVal-Phe(3,4-F <sub>2</sub> )-Arg-ACC                             | 836.3655                         | 836.3784                       |
| 35                           | Ac-His-DVal-Phe(3-F)-Arg-ACC                                             | 818.3750                         | 818.3789                       |
| 36                           | Ac-His-DVal-Thr(Bzl)-Arg-ACC                                             | 844.4106                         | 844.4256                       |
| 37                           | Ac-His-DVal-Phe(4-F)-Arg-ACC                                             | 818.3750                         | 818.3755                       |
| 38                           | Ac-His-DThr-Phe(F <sub>5</sub> )-Lys-ACC                                 | 952.3311                         | 952.3348                       |
| 39                           | Ac-His-DThr-Phe(F <sub>5</sub> )-Leu-ACC                                 | 847.3202                         | 847.3256                       |
| 40                           | Ac-His-DThr-Phe(F <sub>5</sub> )-hArg-ACC                                | 904.3529                         | 904.3597                       |
| 41                           | Ac-His-DThr-Phe(F <sub>5</sub> )-Glu(Bzl)-ACC                            | 953.3257                         | 953.3356                       |
| 42                           | Ac-His-DThr-Phe(F <sub>5</sub> )-Cys(Bzl)-ACC                            | 927.2923                         | 927.3089                       |
| 43                           | Ac-His-DThr-Phe(F <sub>5</sub> )-CysMeBzl)-ACC                           | 941.3079                         | 941.3077                       |
| 44                           | Ac-His-DThr-Phe(F <sub>5</sub> )-Cys(MeOBzl)-ACC                         | 957.3029                         | 957.3066                       |
| 45                           | Ac-His-DThr-Phe(F <sub>5</sub> )-Nle(OBzl)-ACC                           | 953.3621                         | 953.3698                       |
| 46                           | Ac-His-DThr-Phe(F <sub>5</sub> )-Lys(2-Cl-Z)-ACC                         | 1030.3289                        | 1030.3211                      |
| <b>ACTIVITY BASED PROBES</b> |                                                                          |                                  |                                |
|                              |                                                                          | [M+H] <sup>+</sup><br>calculated | [M+H] <sup>+</sup><br>measured |
| 47                           | biotin-6-ahx-His-DThr-Phe(F <sub>5</sub> )-Arg-AOMK<br><b>(MP-cL1)</b>   | 1135.4817                        | 1135.4812                      |
| 48                           | biotin-6-ahx-His-DThr-Phe(F <sub>5</sub> )-Lys-AOMK<br><b>(MP-cL2)</b>   | 1107.4755                        | 1107.4751                      |
| 49                           | Cy5-6-ahx-His-DThr-Phe(F <sub>5</sub> )-Cys(Bzl)-AOMK<br><b>(MP-cL3)</b> | 1410.6419                        | 1410.6027                      |
| 50                           | BODIPY <sub>FL</sub> -6-ahx-Ala-Arg-Leu-Arg-AOMK<br><b>(MP-pc2)</b>      | 1048.6099                        | 1048.6074                      |
| 51                           | Cy3-6-ahx-Ala-Arg-Leu-Arg-AOMK<br><b>(MP-pc3)</b>                        | 606.8864                         | 606.8872                       |
| 52                           | Cy5-Ala-Arg-Leu-Arg-AOMK<br><b>(MP-pc1)</b>                              | 563.3522                         | 563.3511                       |

**Table S9** Molecular masses of peptide fluorogenic substrates and activity based probes used in this study. ACC-labeled substrates displayed at least 95% purity, since the activity based probes displayed over 90% of purity.

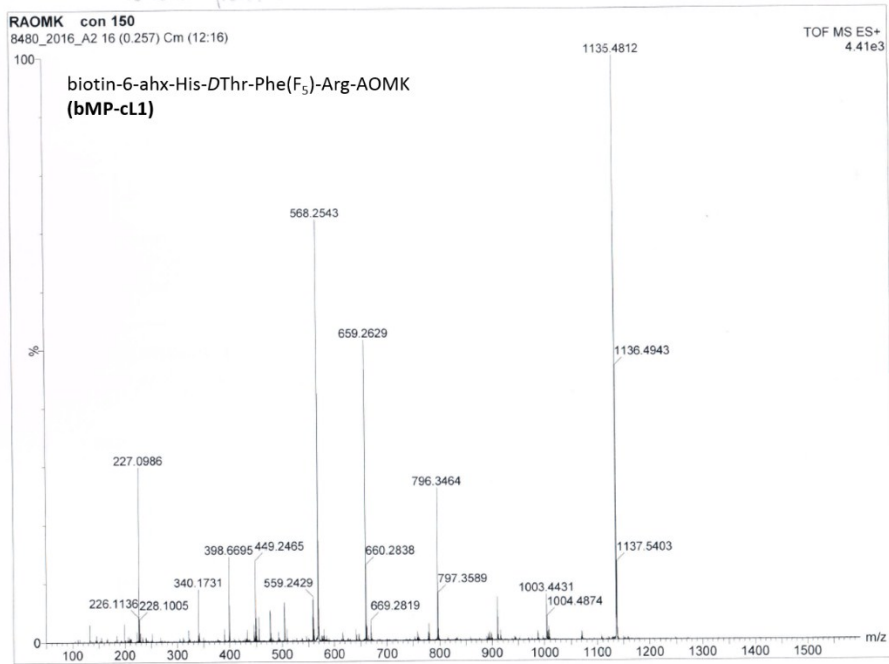

Figure S13 m/z analysis of cathepsin L activity based probe (biotin-6-ahx-His-DThr-Phe(F<sub>5</sub>)-Arg-AOMK; BMP-cL1).

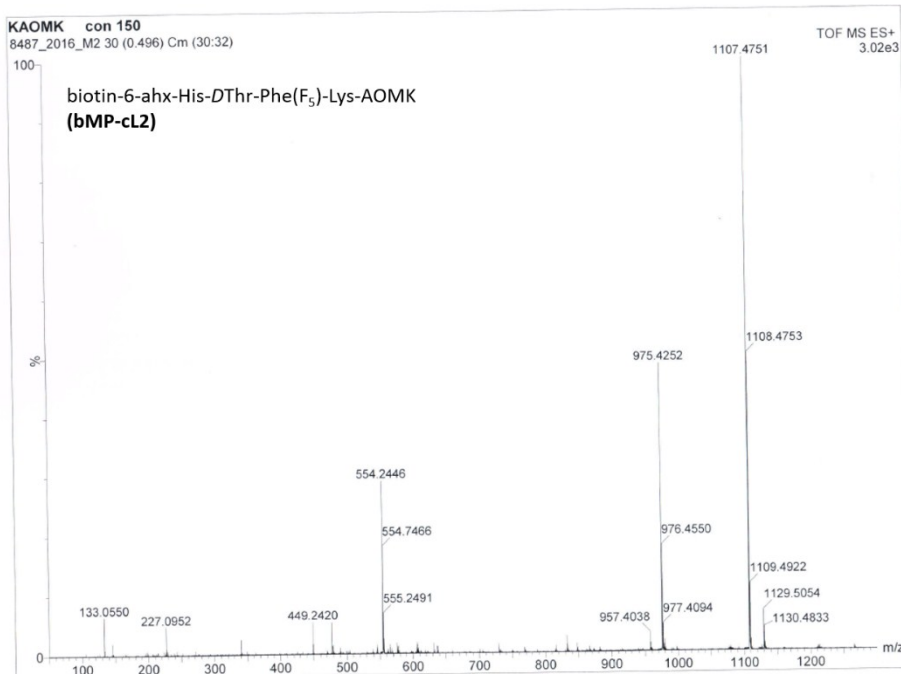

Figure S14 m/z analysis of cathepsin L activity based probe (biotin-6-ahx-His-DThr-Phe(F<sub>5</sub>)-Lys-AOMK; BMP-cL2).

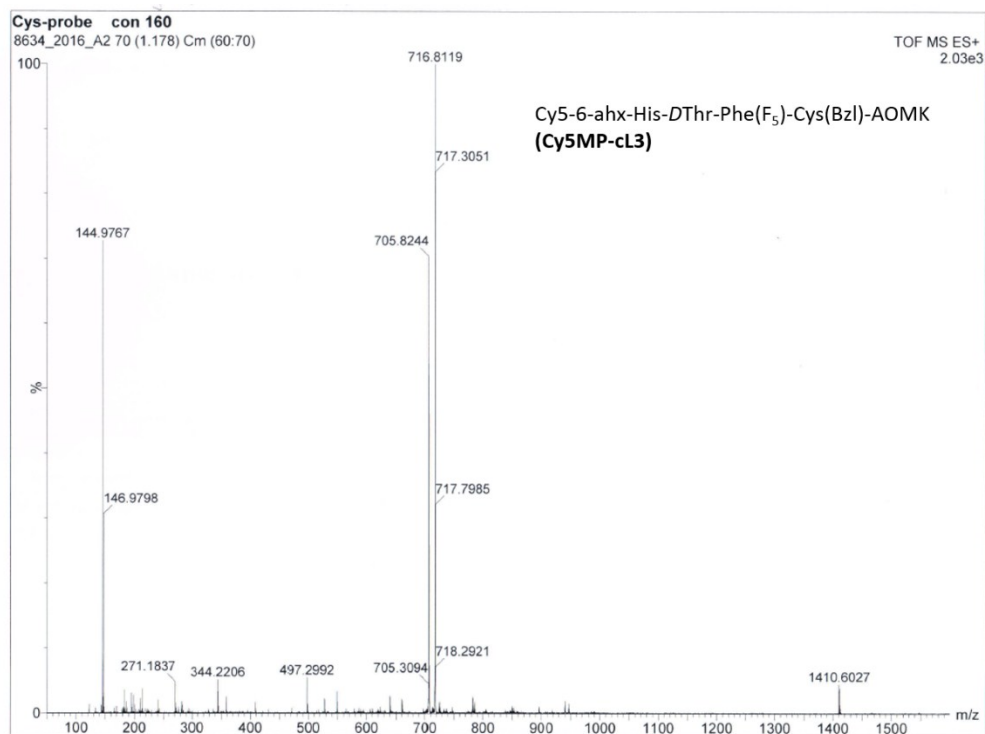

**Figure S15** m/z analysis of cathepsin L activity based probe (Cy5-6-ahx-His-DThr-Phe(F<sub>5</sub>)-Cys(Bzl)-AOMK; Cy5MP-cL3).

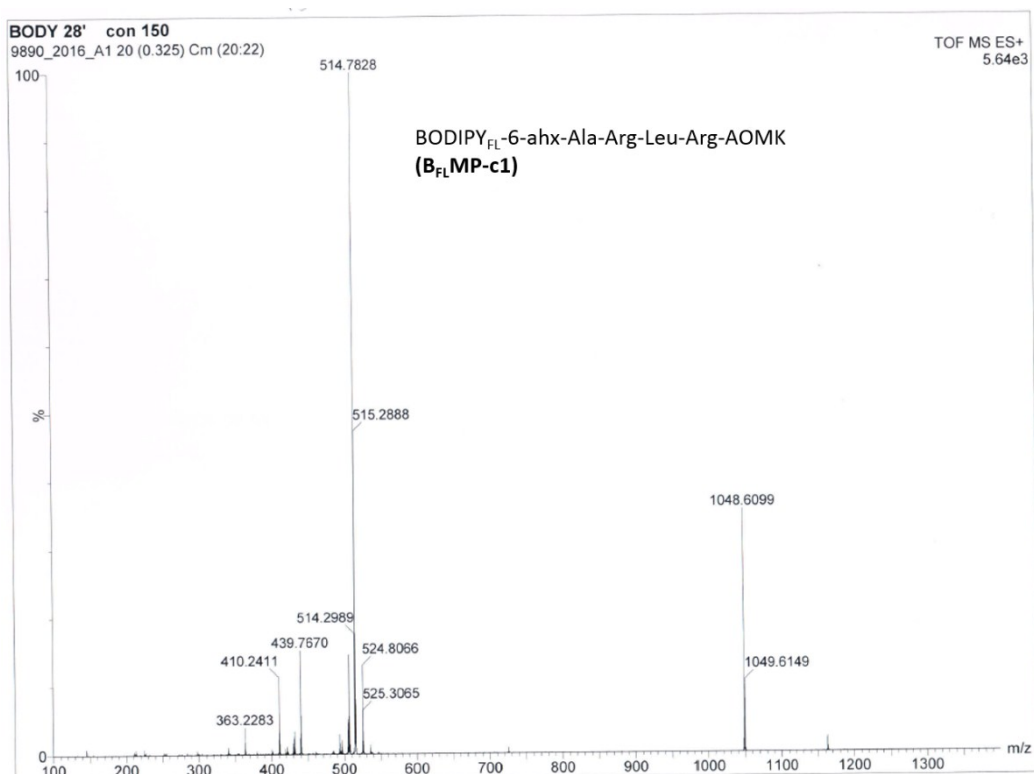

**Figure S16** m/z analysis of broad spectrum cathepsins activity based probe (BDP-6-ahx-ARLR-AOMK; B<sub>FL</sub>MP-c1).

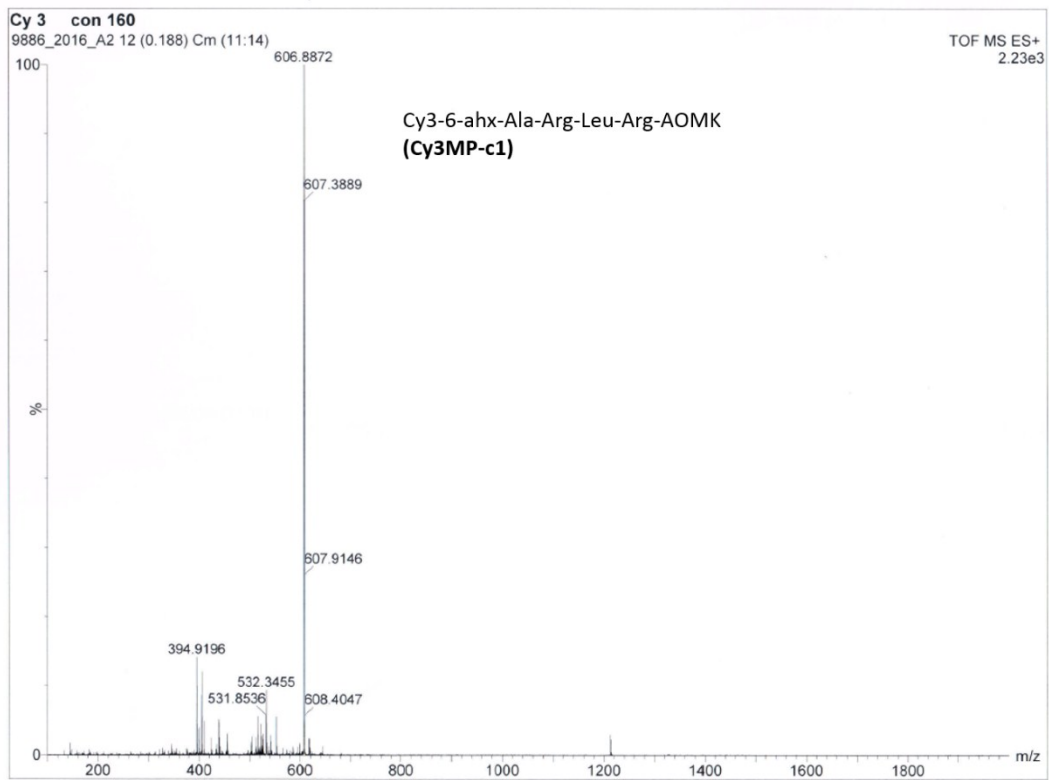

**Figure S17** m/z analysis of broad spectrum cathepsins activity based probe (Cy3-6-ahx-ARLR-AOMK; Cy3MP-c1).

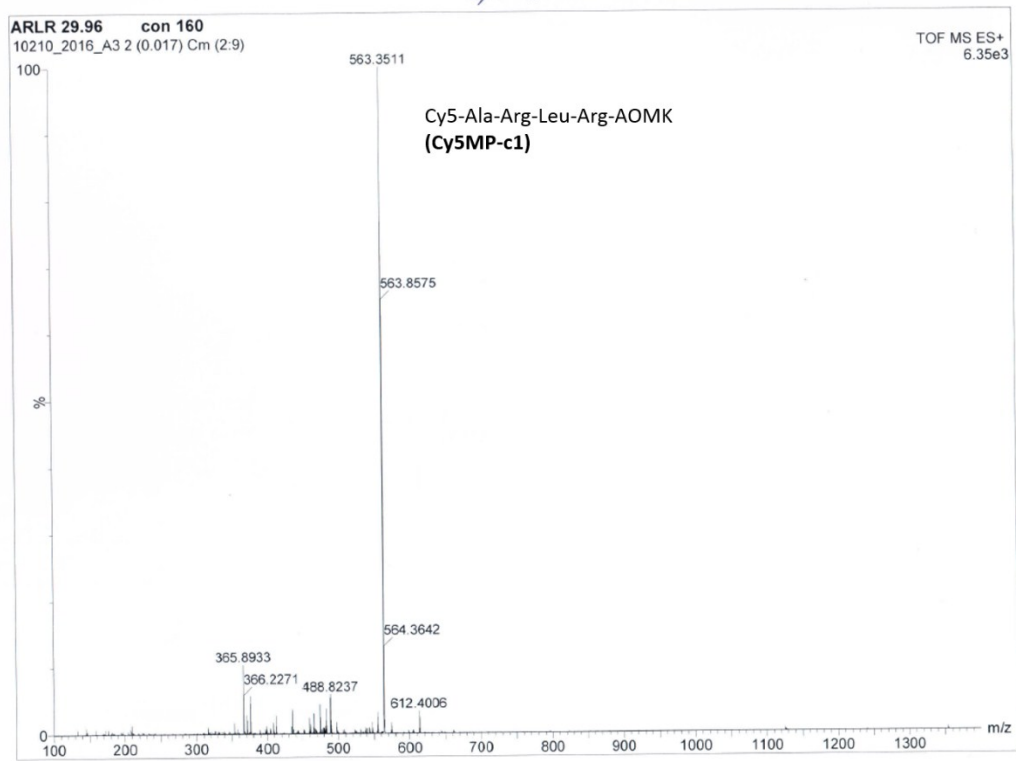

**Figure S18** m/z analysis of broad spectrum cathepsins activity based probe (Cy5-ARLR-AOMK; Cy5MP-c1).



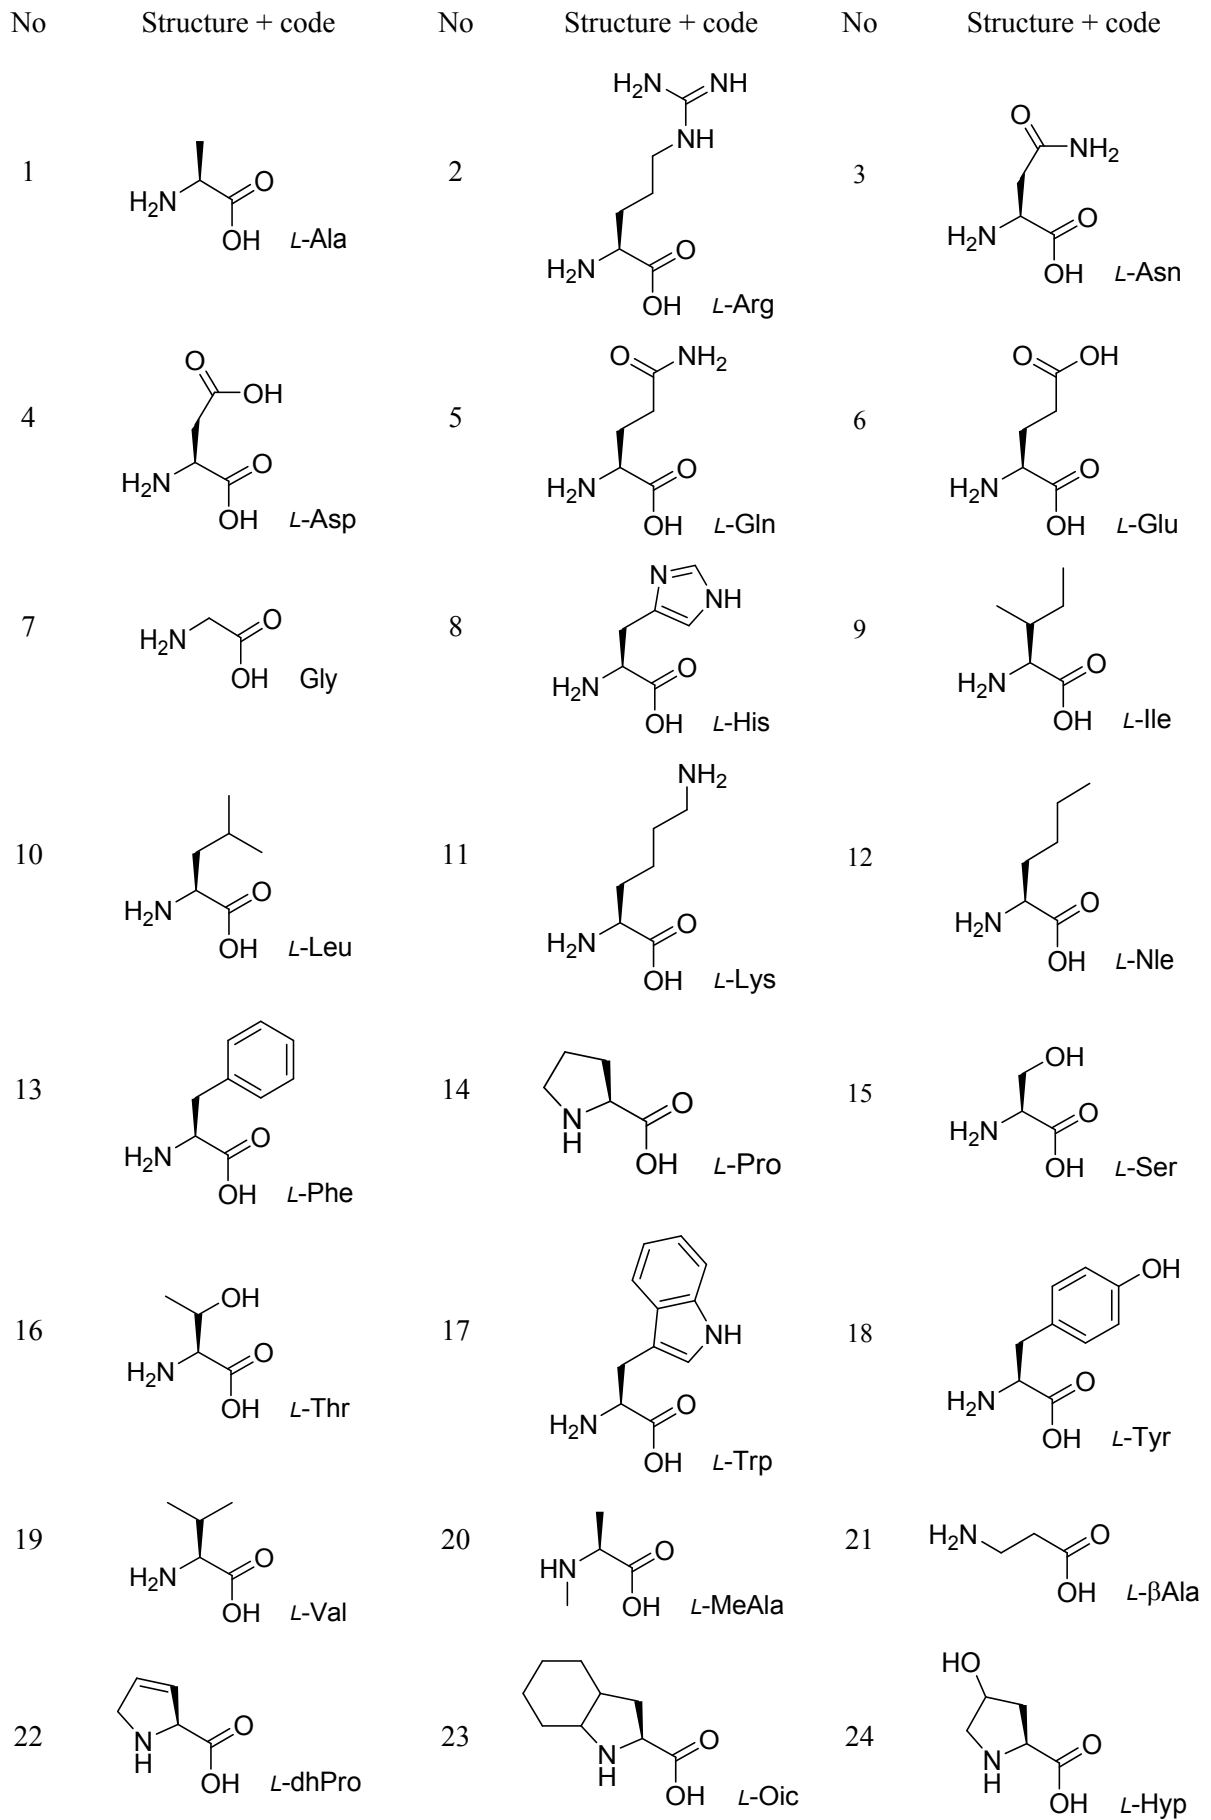

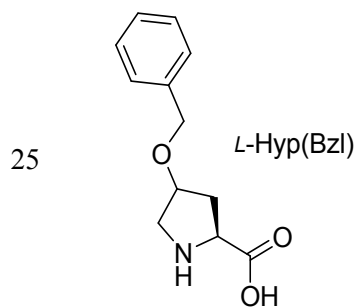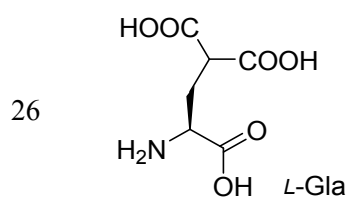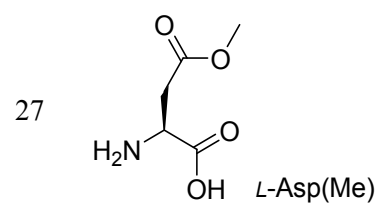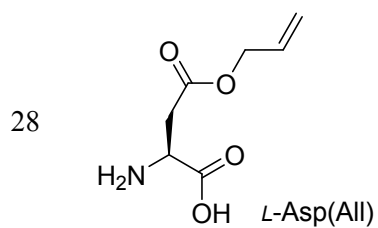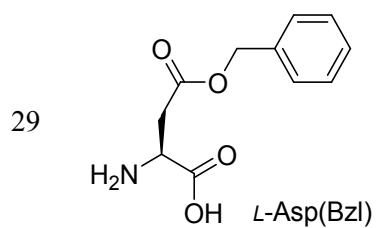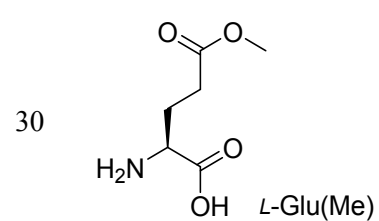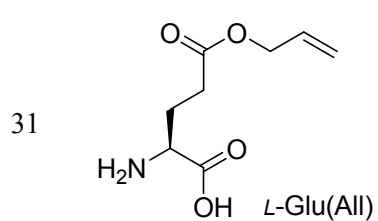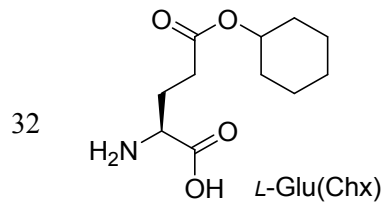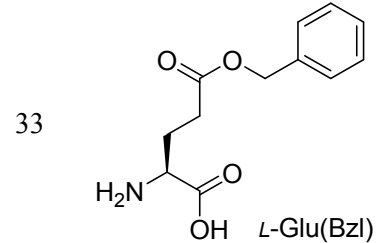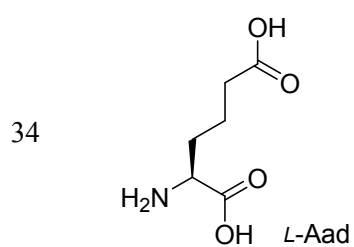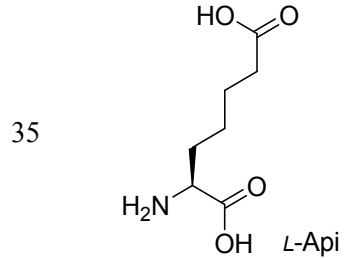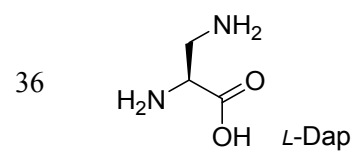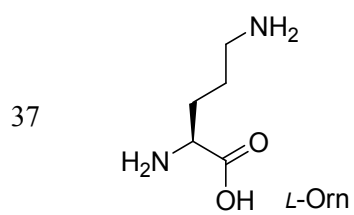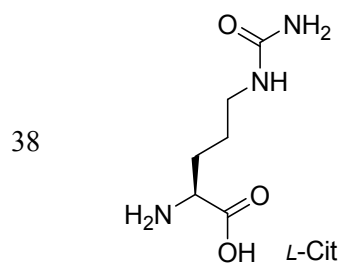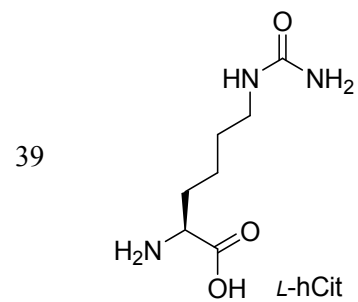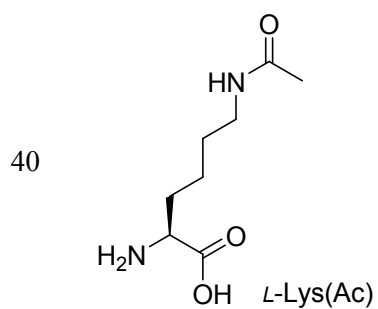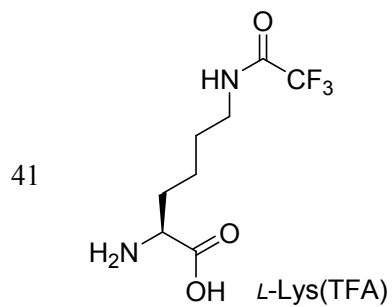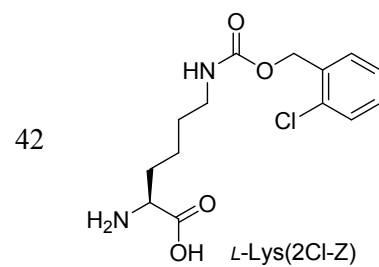

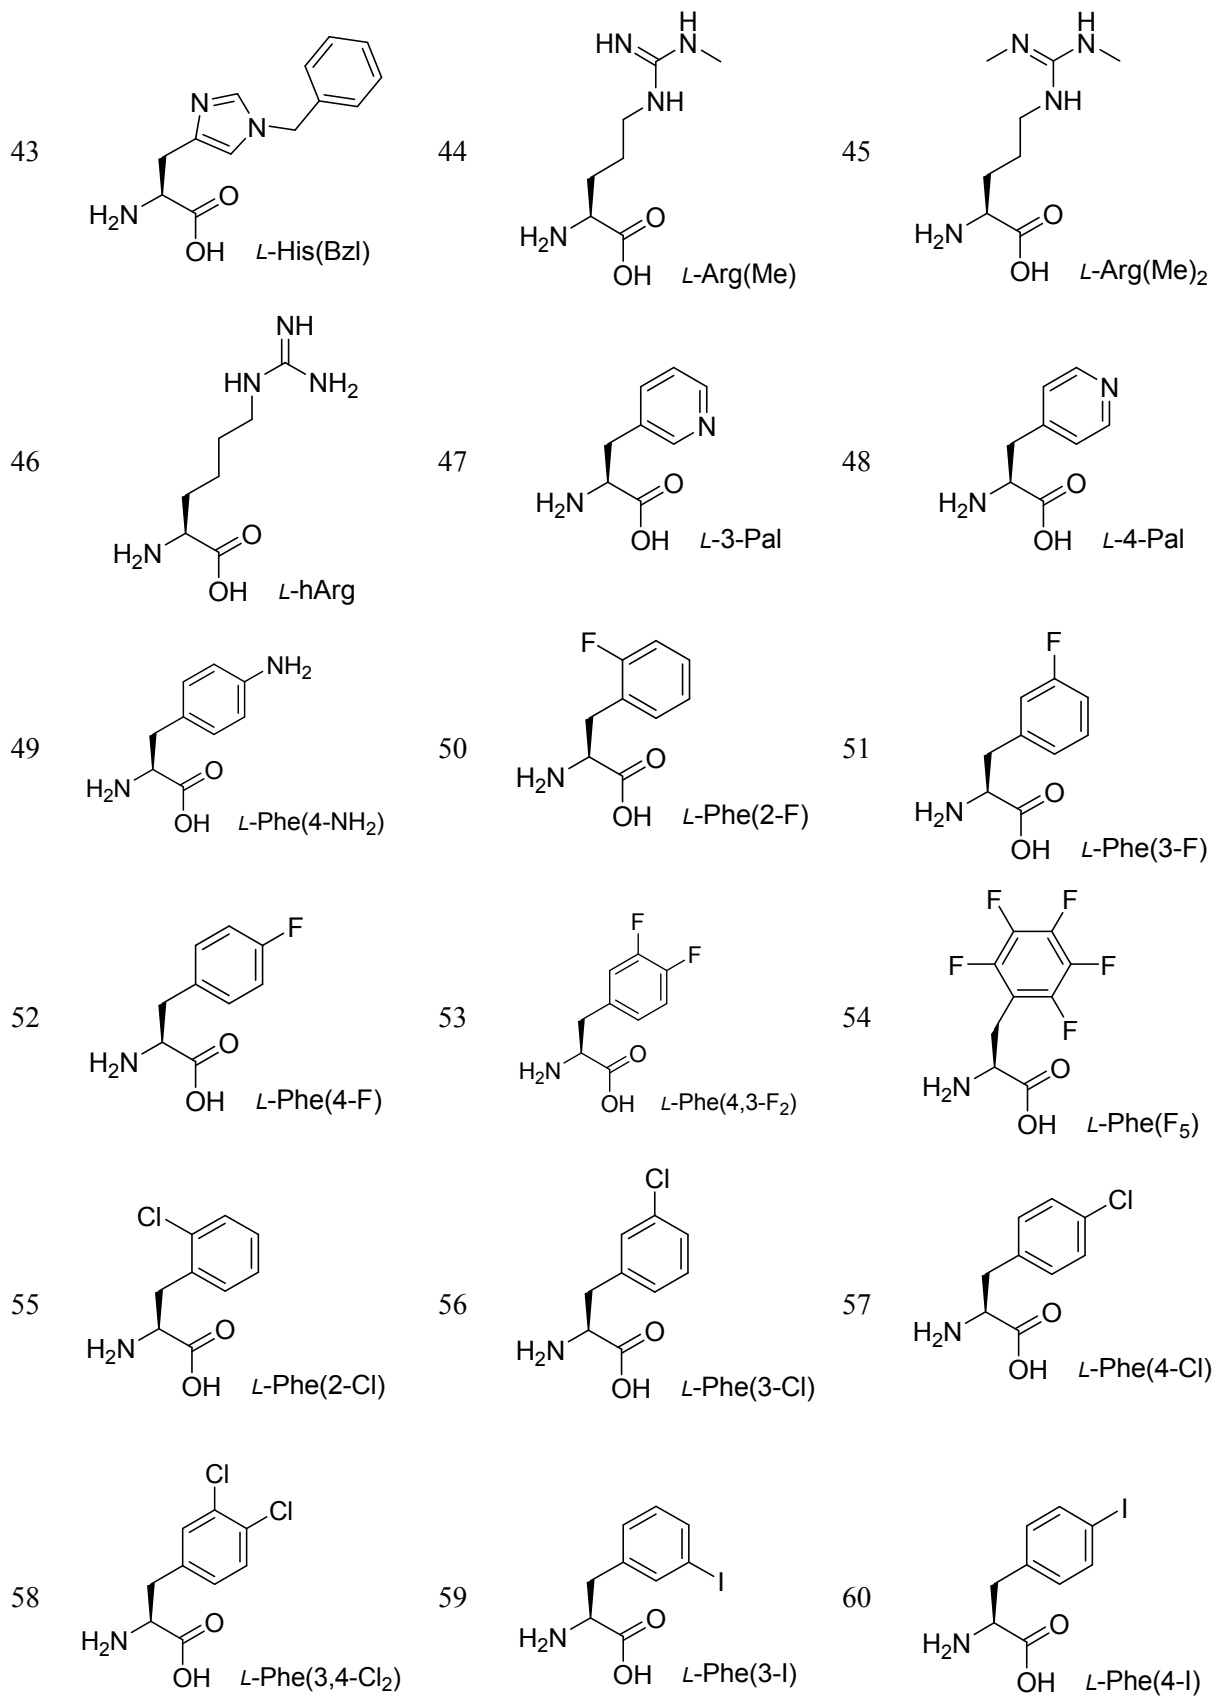

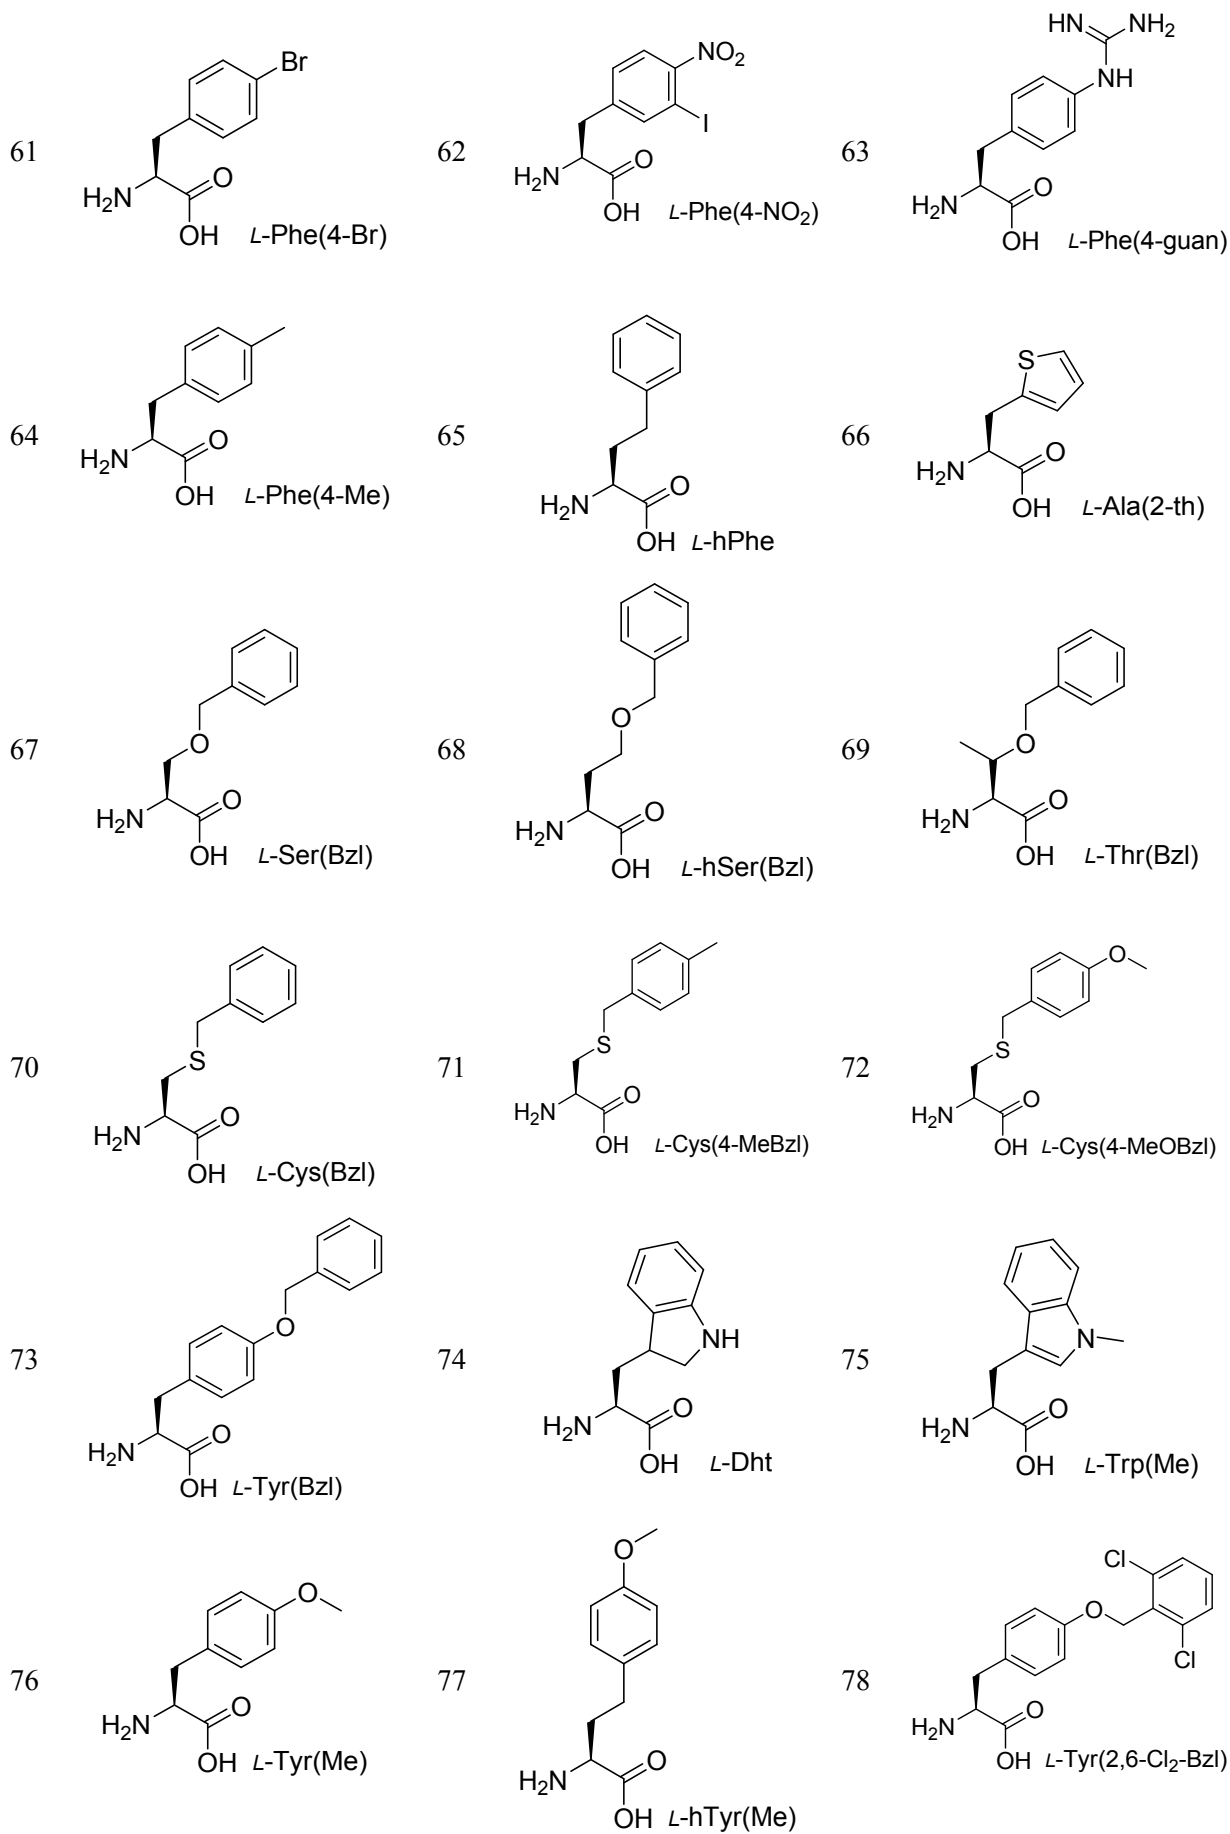

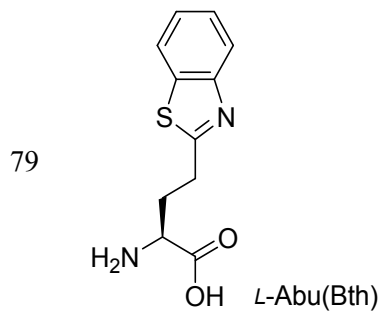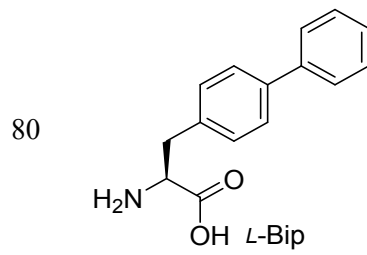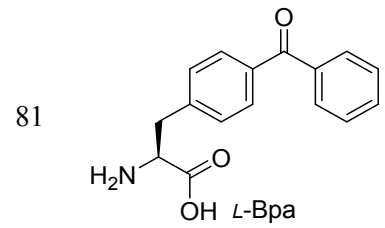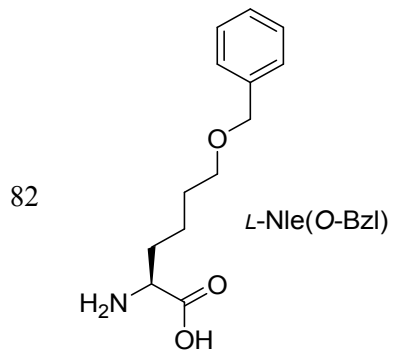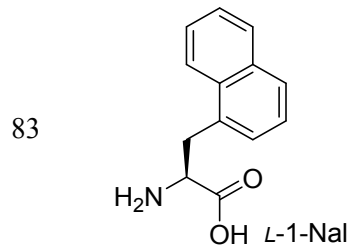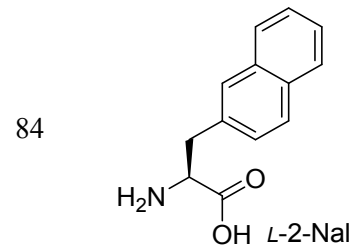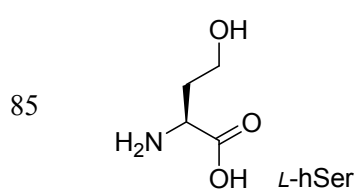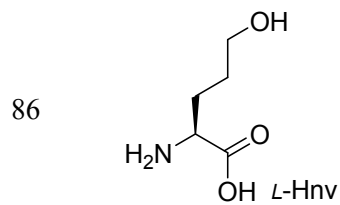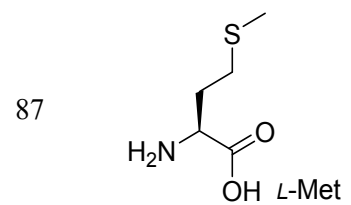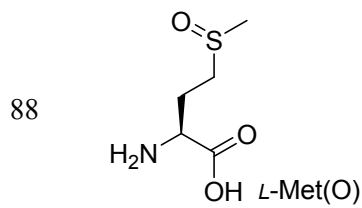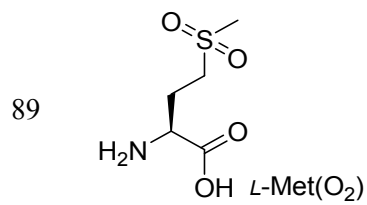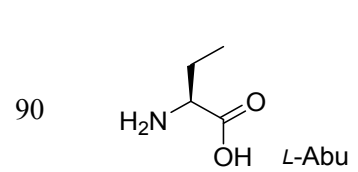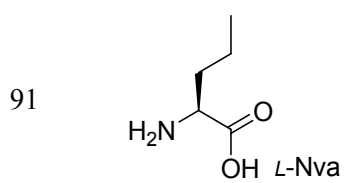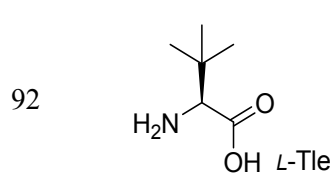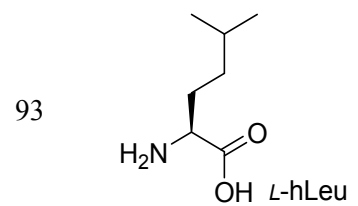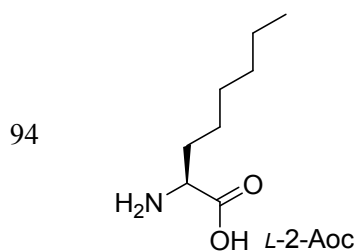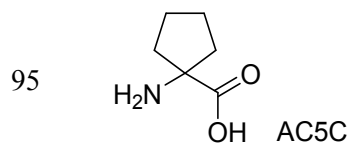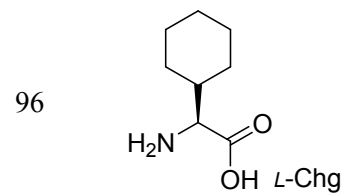

97

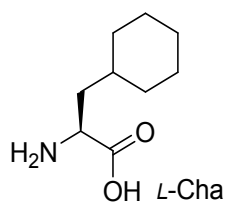

98

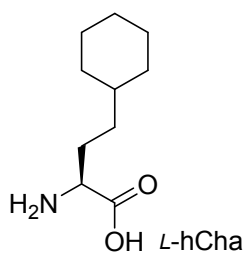

99

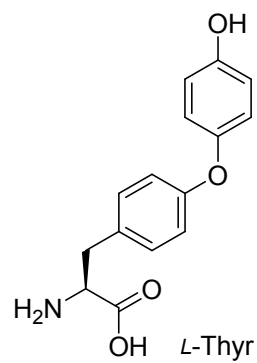

100

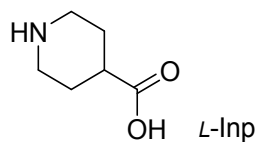

101

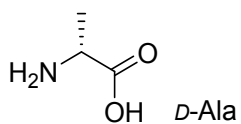

102

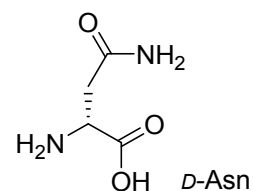

103

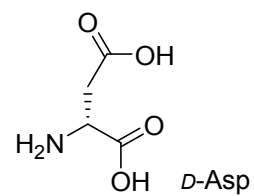

104

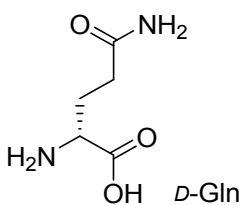

105

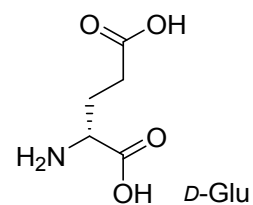

106

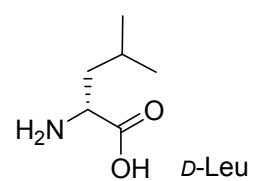

107

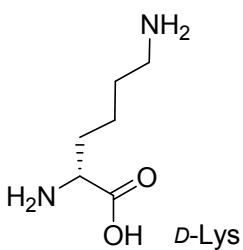

108

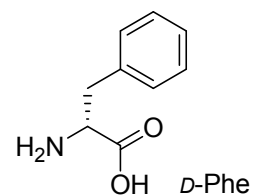

109

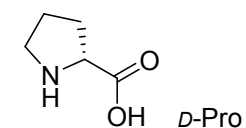

110

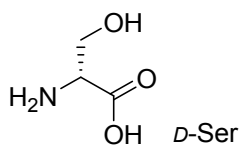

111

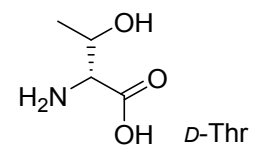

112

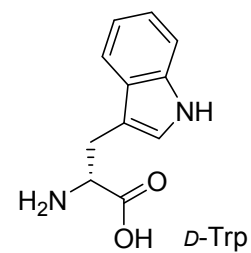

113

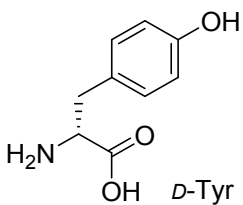

114

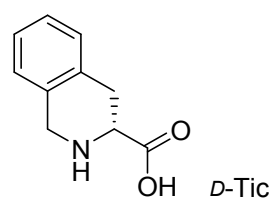

115

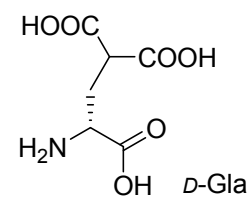

116

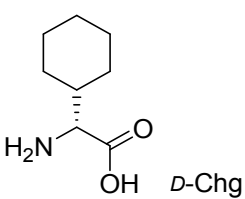

117

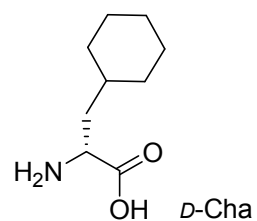

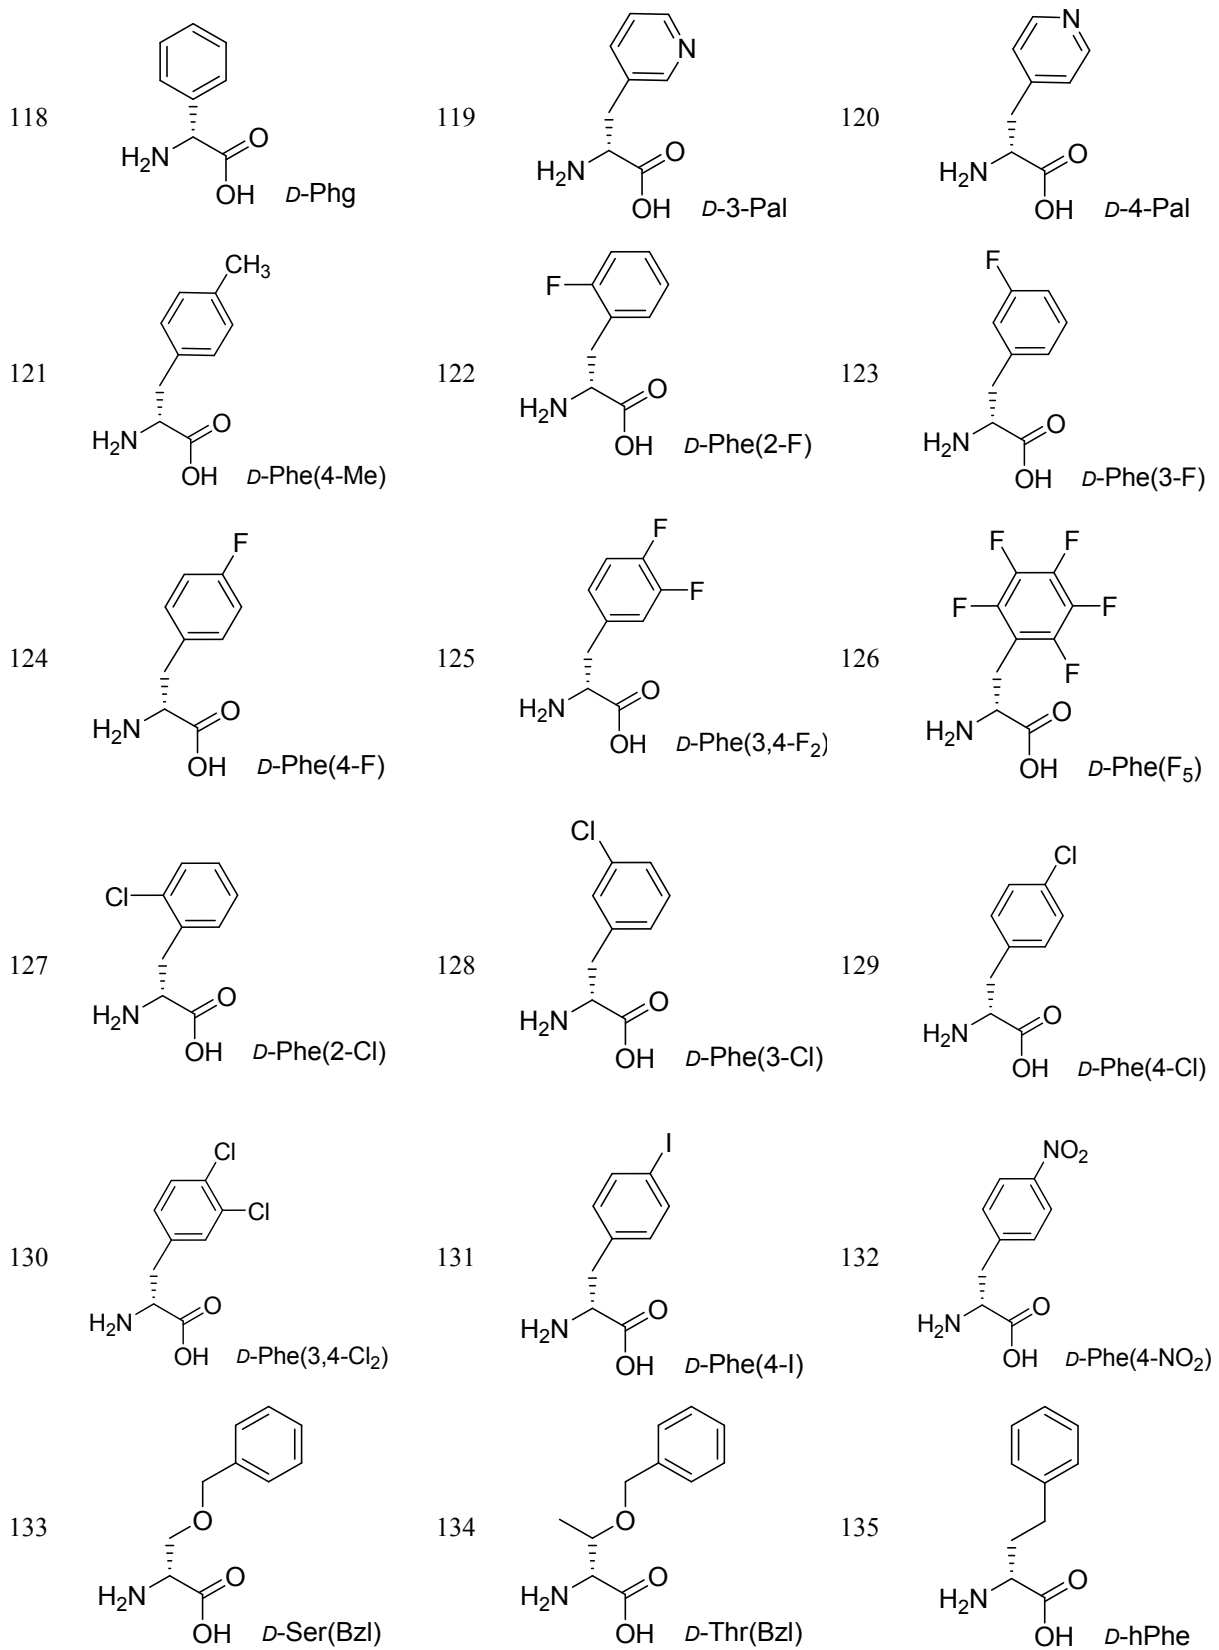

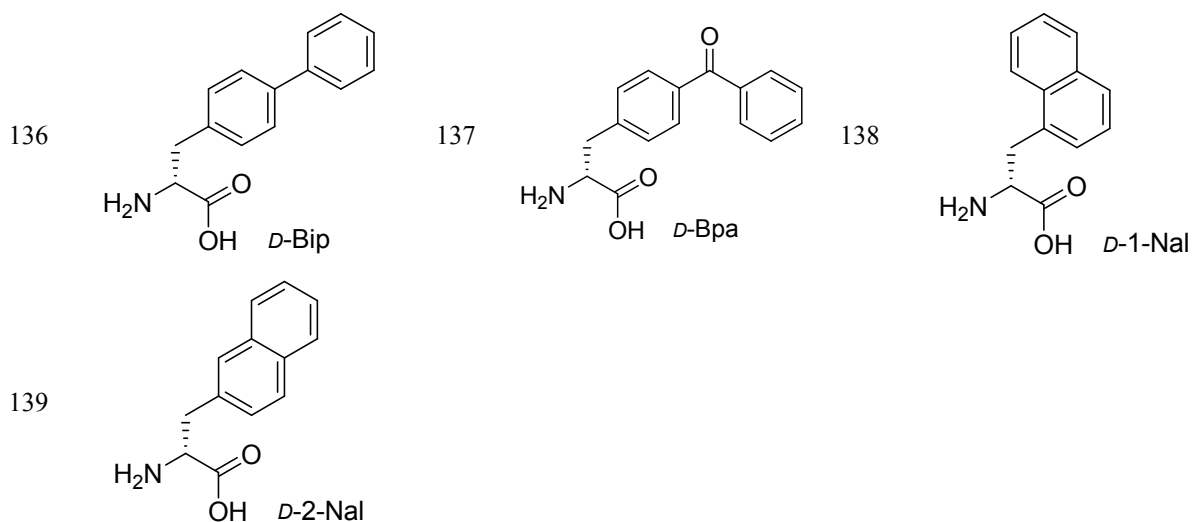

**Table S10** The structures and codes of 139 amino acids used in the synthesis of Ac-ARL-P1-ACC library.

| No. | Ac-ARL-P1-ACC      | No. | Ac-ARL-P1-ACC                           | No. | Ac-ARL-P1-ACC                      |
|-----|--------------------|-----|-----------------------------------------|-----|------------------------------------|
| 1   | <i>L</i> -Ala      | 49  | <i>L</i> -Phe(4-NH <sub>2</sub> )       | 97  | <i>L</i> -Cha                      |
| 2   | <i>L</i> -Arg      | 50  | <i>L</i> -Phe(2-F)                      | 98  | <i>L</i> -hCha                     |
| 3   | <i>L</i> -Asn      | 51  | <i>L</i> -Phe(3-F)                      | 99  | <i>L</i> -Thyr                     |
| 4   | <i>L</i> -Asp      | 52  | <i>L</i> -Phe(4-F)                      | 100 | <i>L</i> -Inp                      |
| 5   | <i>L</i> -Gln      | 53  | <i>L</i> -Phe(3,4-F <sub>2</sub> )      | 101 | <i>D</i> -Ala                      |
| 6   | <i>L</i> -Glu      | 54  | <i>L</i> -Phe(F <sub>5</sub> )          | 102 | <i>D</i> -Asn                      |
| 7   | Gly                | 55  | <i>L</i> -Phe(2-Cl)                     | 103 | <i>D</i> -Asp                      |
| 8   | <i>L</i> -His      | 56  | <i>L</i> -Phe(3-Cl)                     | 104 | <i>D</i> -Gln                      |
| 9   | <i>L</i> -Ile      | 57  | <i>L</i> -Phe(4-Cl)                     | 105 | <i>D</i> -Glu                      |
| 10  | <i>L</i> -Leu      | 58  | <i>L</i> -Phe(3,4-Cl <sub>2</sub> )     | 106 | <i>D</i> -Leu                      |
| 11  | <i>L</i> -Lys      | 59  | <i>L</i> -Phe(3-I)                      | 107 | <i>D</i> -Lys                      |
| 12  | <i>L</i> -Nle      | 60  | <i>L</i> -Phe(4-I)                      | 108 | <i>D</i> -Phe                      |
| 13  | <i>L</i> -Phe      | 61  | <i>L</i> -Phe(4-Br)                     | 109 | <i>D</i> -Pro                      |
| 14  | <i>L</i> -Pro      | 62  | <i>L</i> -Phe(4-NO <sub>2</sub> )       | 110 | <i>D</i> -Ser                      |
| 15  | <i>L</i> -Ser      | 63  | <i>L</i> -Phe(guan)                     | 111 | <i>D</i> -Thr                      |
| 16  | <i>L</i> -Thr      | 64  | <i>L</i> -Phe(4-Me)                     | 112 | <i>D</i> -Trp                      |
| 17  | <i>L</i> -Trp      | 65  | <i>L</i> -hPhe                          | 113 | <i>D</i> -Tyr                      |
| 18  | <i>L</i> -Tyr      | 66  | <i>L</i> -Ala(2th)                      | 114 | <i>D</i> -Tic                      |
| 19  | <i>L</i> -Val      | 67  | <i>L</i> -Ser(Bzl)                      | 115 | <i>D</i> -Gla                      |
| 20  | <i>L</i> -MeAla    | 68  | <i>L</i> -Hse(Bzl)                      | 116 | <i>D</i> -Chg                      |
| 21  | beta-Ala           | 69  | <i>L</i> -Thr(Bzl)                      | 117 | <i>D</i> -Cha                      |
| 22  | dhPro              | 70  | <i>L</i> -Cys(Bzl)                      | 118 | <i>D</i> -Phg                      |
| 23  | <i>L</i> -Oic      | 71  | <i>L</i> -Cys(MeBzl)                    | 119 | <i>D</i> -3-Pal                    |
| 24  | <i>L</i> -Hyp      | 72  | <i>L</i> -Cys(4-MeOBzl)                 | 120 | <i>D</i> -4-Pal                    |
| 25  | <i>L</i> -Hyp(Bzl) | 73  | <i>L</i> -Tyr(Bzl)                      | 121 | <i>D</i> -Phe(4-Me)                |
| 26  | <i>L</i> -Gla      | 74  | <i>L</i> -Dht                           | 122 | <i>D</i> -Phe(2-F)                 |
| 27  | <i>L</i> -Asp(Me)  | 75  | <i>L</i> -Trp(Me)                       | 123 | <i>D</i> -Phe(3-F)                 |
| 28  | <i>L</i> -Asp(All) | 76  | <i>L</i> -Tyr(Me)                       | 124 | <i>D</i> -Phe(4-F)                 |
| 29  | <i>L</i> -Asp(Bzl) | 77  | <i>L</i> -hTyr(Me)                      | 125 | <i>D</i> -Phe(3,4-F <sub>2</sub> ) |
| 30  | <i>L</i> -Glu(Me)  | 78  | <i>L</i> -Tyr(2,6-Cl <sub>2</sub> -Bzl) | 126 | <i>D</i> -Phe(F <sub>5</sub> )     |



|    |                                |    |                               |     |                                     |
|----|--------------------------------|----|-------------------------------|-----|-------------------------------------|
| 31 | <i>L</i> -Glu(All)             | 79 | <i>L</i> -Abu(Bth)            | 127 | <i>D</i> -Phe(2-Cl)                 |
| 32 | <i>L</i> -Glu(Chx)             | 80 | <i>L</i> -Bip                 | 128 | <i>D</i> -Phe(3-Cl)                 |
| 33 | <i>L</i> -Glu(Bzl)             | 81 | <i>L</i> -Bpa                 | 129 | <i>D</i> -Phe(4-Cl)                 |
| 34 | <i>L</i> -Aad                  | 82 | <i>L</i> -Nle(O-Bzl)          | 130 | <i>D</i> -Phe(3,4-Cl <sub>2</sub> ) |
| 35 | <i>L</i> -Api                  | 83 | <i>L</i> -1-Nal               | 131 | <i>D</i> -Phe(4-I)                  |
| 36 | <i>L</i> -Dap                  | 84 | <i>L</i> -2-Nal               | 132 | <i>D</i> -Phe(4-NO <sub>2</sub> )   |
| 37 | <i>L</i> -Orn                  | 85 | <i>L</i> -Hse                 | 133 | <i>D</i> -Ser(Bzl)                  |
| 38 | <i>L</i> -Cit                  | 86 | <i>L</i> -Hnv                 | 134 | <i>D</i> -Thr(Bzl)                  |
| 39 | <i>L</i> -hCit                 | 87 | <i>L</i> -Met                 | 135 | <i>D</i> -hPhe                      |
| 40 | <i>L</i> -Lys(Ac)              | 88 | <i>L</i> -Met(O)              | 136 | <i>D</i> -Bip                       |
| 41 | <i>L</i> -Lys(tfa)             | 89 | <i>L</i> -Met(O) <sub>2</sub> | 137 | <i>D</i> -Bpa                       |
| 42 | <i>L</i> -Lys(2Cl-Z)           | 90 | <i>L</i> -Abu                 | 138 | <i>D</i> -1-Nal                     |
| 43 | <i>L</i> -His(Bzl)             | 91 | <i>L</i> -Nva                 | 139 | <i>D</i> -2-Nal                     |
| 44 | <i>L</i> -Arg(Me)              | 92 | <i>L</i> -Tle                 |     |                                     |
| 45 | <i>L</i> -Arg(Me) <sub>2</sub> | 93 | <i>L</i> -hLeu                |     |                                     |
| 46 | <i>L</i> -hArg                 | 94 | <i>L</i> -2-Aoc               |     |                                     |
| 47 | <i>L</i> -3-Pal                | 95 | AC5C                          |     |                                     |
| 48 | <i>L</i> -4-Pal                | 96 | <i>L</i> -Chg                 |     |                                     |

**Table 11** The list of amino acids used in the P1 Ac-Ala-Arg-Leu-X-ACC library.

|   |       |    |       |    |             |
|---|-------|----|-------|----|-------------|
| 1 | L-Ala | 41 | L-Oic | 81 | L-Phe(4-Br) |
| 2 | L-Arg | 42 | L-Idc | 82 | L-Phe(4-Me) |
| 3 | L-Asn | 43 | L-Pip | 83 | L-3-Pal     |

|    |              |    |                |     |                 |
|----|--------------|----|----------------|-----|-----------------|
| 4  | L-Asp        | 44 | L-Tic          | 84  | L-4-Pal         |
| 5  | L-Gln        | 45 | dhAbu          | 85  | L-Ala(2th)      |
| 6  | L-Glu        | 46 | dhLeu          | 86  | L-Ala(Bth)      |
| 7  | Gly          | 47 | L-Dap          | 87  | L-Bta           |
| 8  | L-His        | 48 | L-Dab          | 88  | L-Abu           |
| 9  | L-Ile        | 49 | L-Dab(Z)       | 89  | L-Abu(Bth)      |
| 10 | L-Leu        | 50 | L-Cit          | 90  | L-Ser(Ac)       |
| 11 | L-Lys        | 51 | L-hCit         | 91  | L-Ser(Bzl)      |
| 12 | L-Nle        | 52 | L-Orn          | 92  | L-hSer          |
| 13 | L-Phe        | 53 | L-Lys(TFA)     | 93  | L-hSer(Bzl)     |
| 14 | L-Pro        | 54 | L-Lys(Ac)      | 94  | L-Thr(Bzl)      |
| 15 | L-Ser        | 55 | L-Lys(2-ClZ)   | 95  | L-Cys(Bzl)      |
| 16 | L-Thr        | 56 | L-Agp          | 96  | L-Cys(MeBzl)    |
| 17 | L-Trp        | 57 | L-Agb          | 97  | L-Cys(4-MeOBzl) |
| 18 | L-Tyr        | 58 | L-Arg(NO2)     | 98  | L-Nle(O-Bzl)    |
| 19 | L-Val        | 59 | L-Arg(Z)2      | 99  | L-Phg           |
| 20 | D-Ala        | 60 | L-hArg         | 100 | L-hPhe          |
| 21 | D-Arg        | 61 | L-His(3-Bom)   | 101 | L-Chg           |
| 22 | D-Asn        | 62 | L-Phe(NH2)     | 102 | L-Cha           |
| 23 | D-Asp        | 63 | L-Phe(guan)    | 103 | L-hCha          |
| 24 | D-Gln        | 64 | L-Trp(Me)      | 104 | L-Igl           |
| 25 | D-Glu        | 65 | L-Dht          | 105 | L-1-Nal         |
| 26 | D-His        | 66 | L-Asp(Me)      | 106 | L-2-Nal         |
| 27 | D-Leu        | 67 | L-Asp(Chx)     | 107 | L-Bpa           |
| 28 | D-Lys        | 68 | L-Asp(Bzl)     | 108 | L-2-Aoc         |
| 29 | D-Phe        | 69 | L-Glu(Me)      | 109 | L-hLeu          |
| 30 | D-Pro        | 70 | L-Glu(Chx)     | 110 | L-NptGly        |
| 31 | D-Ser        | 71 | L-Glu(Bzl)     | 111 | L-Hnv           |
| 32 | D-Phg        | 72 | L-Phe(2-F)     | 112 | L-Tle           |
| 33 | D-Thr        | 73 | L-Phe(3-F)     | 113 | L-Tyr(Me)       |
| 34 | D-Trp        | 74 | L-Phe(4-F)     | 114 | L-Tyr(2,6Cl2-Z) |
| 35 | D-Tyr        | 75 | L-Phe(3,4-F2)  | 115 | L-Tyr(Bzl)      |
| 36 | D-Val        | 76 | L-Phe(F5)      | 116 | L-Tyr(2-Br-Z)   |
| 37 | $\beta$ -Ala | 77 | L-Phe(2-Cl)    | 117 | L-hTyr          |
| 38 | L-Hyp        | 78 | L-Phe(3-Cl)    | 118 | L-hTyr(Me)      |
| 39 | L-Hyp(Bzl)   | 79 | L-Phe(4-Cl)    | 119 | L-Nva           |
| 40 | L-Thz        | 80 | L-Phe(3,4-Cl2) | 120 | L-Met(O)        |

**Table S12** The list of amino acids used for the synthesis of P4-P2 Hybrid Combinatorial Substrate Library with the fixed Arg in P1 and ACC in P1' position.

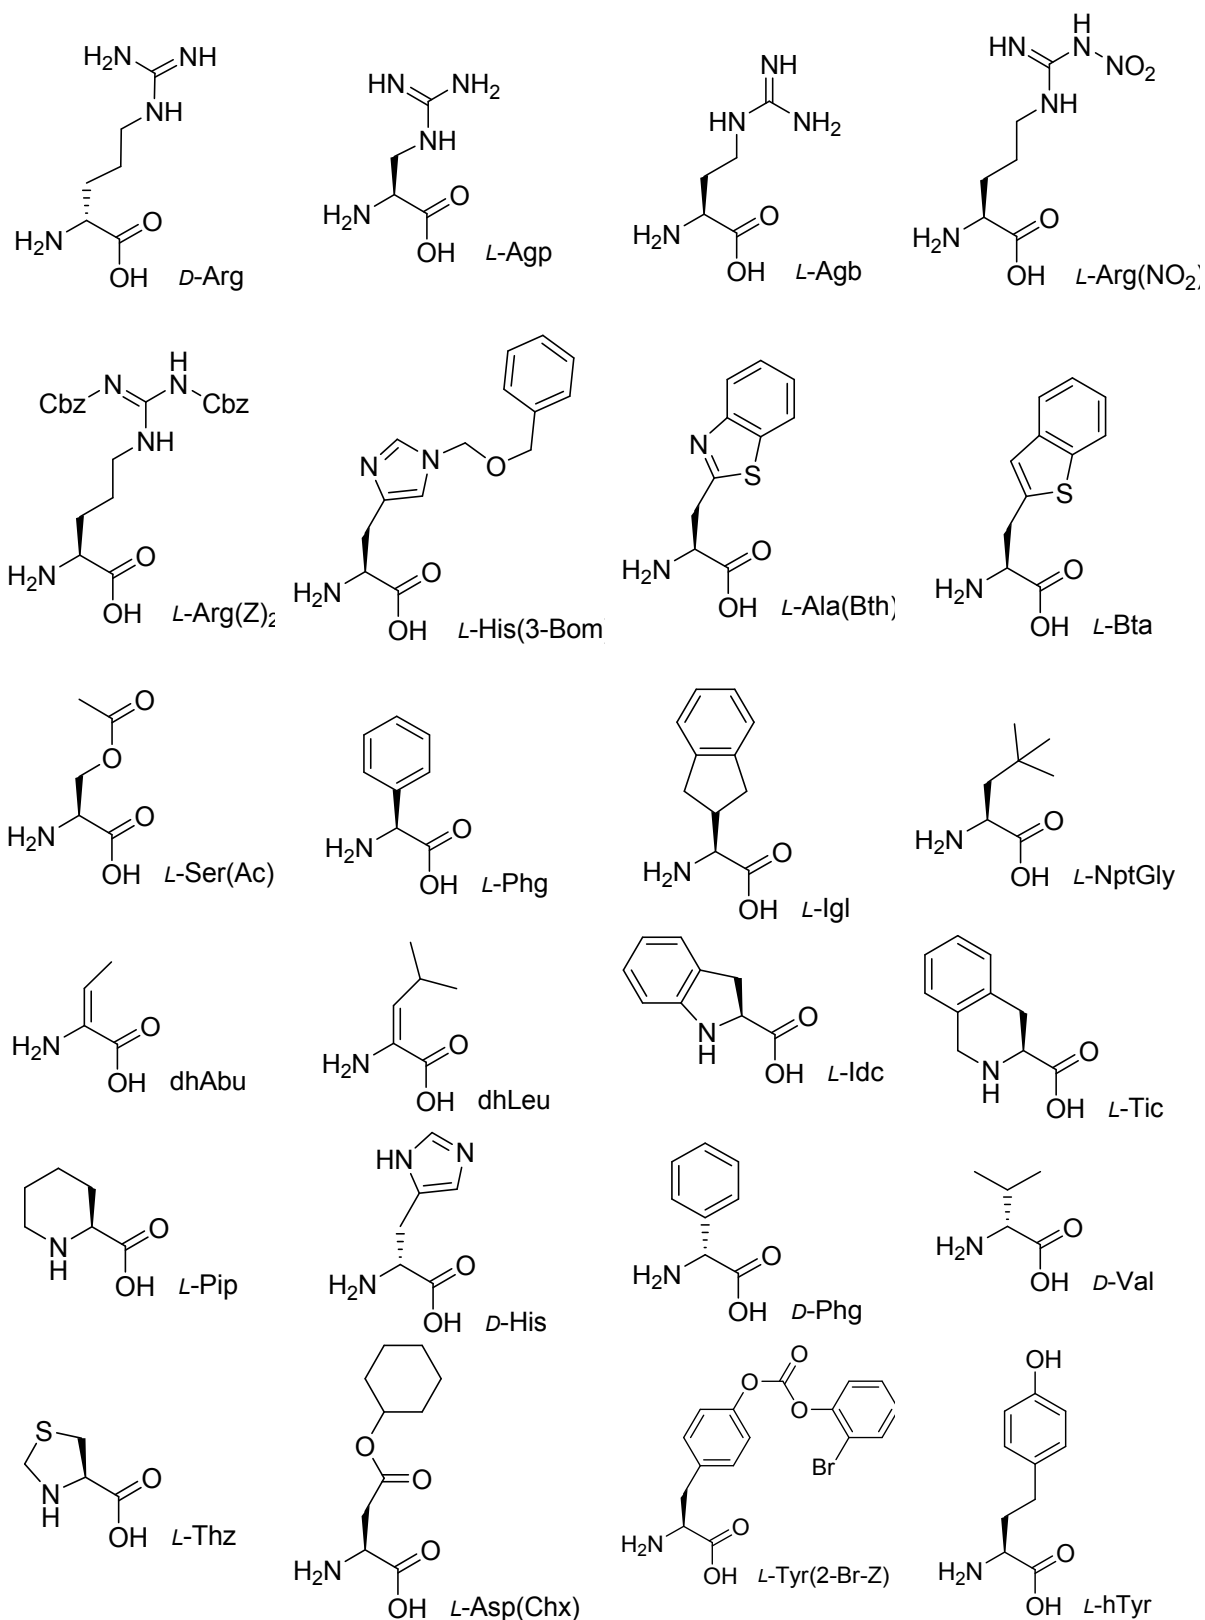

**Table S13** The structures of amino acids that were also used In the HyCoSuL, but were not presented In Table 7.
